# Supplementary material for: Rethinking the influence of hydroelectric development on gene flow in a long-lived fish, the Lake Sturgeon Acipenser fulvescens
Source: PLoS One. 2017 Mar 22;12(3):e0174269. doi: 10.1371/journal.pone.0174269 (PMC5362236; doi:10.1371/journal.pone.0174269)
Supplement: S1 Dataset — (XLSX) [file pone.0174269.s001.xlsx]

## Sheet: Control Data (known sibship)
Original Order	Sampling year	Ind	Mother ID	Father ID	AfuG74	AfuG74-2	AfuG56	AfuG56-2	Afu68	Afu68-2	AfuG195	AfuG195-2	Afu68b	Afu68b-2	AfuG160	AfuG160-2	AfuG112	AfuG112-2	AfuG63	AfuG63-2	AfuG9	AfuG9-2	Spl120	Spl120-2
1	2009	Family G, Ind-1	Female A	Male X	222	226	266	266	112	132	161	165	157	181	135	135	256	260	139	139	124	152	254	286
2	2009	Family G, Ind-2	Female A	Male X	222	226	266	266	112	132	165	165	157	201	135	135	256	256	139	139	144	152	254	286
3	2009	Family G, Ind-3	Female A	Male X	222	222	266	266	112	112	165	165	181	201	135	135	256	260	139	139	144	144	286	286
4	2009	Family G, Ind-4	Female A	Male X	222	226	266	266	112	112	161	165	157	157	135	135	256	260	139	139	144	152	254	262
5	2009	Family G, Ind-5	Female A	Male X	222	226	266	266	112	132	161	165	157	157	135	135	256	260	139	139	152	152	254	262
6	2009	Family G, Ind-6	Female A	Male X	226	226			112	132	165	165	157	181	135	135	256	256	139	139	152	152	262	286
7	2009	Family G, Ind-7	Female A	Male X	222	226	266	266	112	112	165	165	157	181	135	135	256	256	139	139	144	152	286	286
8	2009	Family G, Ind-8	Female A	Male X	222	222	266	266	112	132	161	165	157	157	135	135	256	260	139	139			254	286
9	2009	Family G, Ind-9	Female A	Male X	222	222	266	266	112	112	161	165	157	181	135	135	256	260	139	139	144	152	262	286
10	2009	Family G, Ind-10	Female A	Male X	226	226	266	266	112	112	165	165	157	157	135	135	256	260	139	139	124	152	262	286
11	2009	Family G, Ind-11	Female A	Male X	222	222	266	266	112	132	161	165	157	181	135	135	256	260	139	139	124	144	262	286
12	2009	Family G, Ind-12	Female A	Male X	222	226	266	266	112	112	161	165	181	201	135	135	256	260	139	139	144	152	286	286
13	2009	Family G, Ind-13	Female A	Male X	226	226	266	266	112	132	161	165	157	157	135	135	256	256	139	139	144	152	254	286
14	2009	Family G, Ind-14	Female A	Male X	222	226	266	266	112	112	161	165	157	201	135	135	256	260	139	139	144	152	286	286
15	2009	Family G, Ind-15	Female A	Male X	226	226	266	266	112	132	161	165	181	201	135	135	256	260	139	139	124	144	286	286
16	2009	Family J, Ind-1	Female B	Male Y	222	226	266	274	112	112	161	165	157	189	135	151	256	260	139	139	152	152	286	286
17	2009	Family J, Ind-2	Female B	Male Y	222	226	266	266	112	112	161	165	181	189	135	151	256	260	139	143	144	152	254	282
18	2009	Family J, Ind-3	Female B	Male Y	222	226	266	274	112	112	161	165	165	181	135	135	256	260	139	139	144	152	254	282
19	2009	Family J, Ind-4	Female B	Male Y	218	222	266	274	112	112	161	165	165	181	135	135	256	260	139	143	152	152	282	286
20	2009	Family J, Ind-5	Female B	Male Y	218	222	266	274	112	112	161	161	181	189	135	151	244	260	139	139	152	152	254	282
21	2009	Family J, Ind-6	Female B	Male Y	222	226	266	274	112	112	161	161	157	165	135	151	244	260	139	139	144	152	286	286
22	2009	Family J, Ind-7	Female B	Male Y	222	226	266	266	112	112	161	165	157	165	135	135	256	260	139	143	144	152	286	286
23	2009	Family J, Ind-8	Female B	Male Y	222	226	266	266	112	112	161	165	157	189	135	135	256	260	139	143	144	152	254	286
24	2009	Family J, Ind-9	Female B	Male Y	218	222	266	274	112	112	161	161	165	181	135	151	244	260	139	143	152	152	254	282
25	2009	Family J, Ind-10	Female B	Male Y	222	226	266	266	112	112	161	161	165	181	135	151	244	260	139	143	144	152	282	286
26	2009	Family J, Ind-11	Female B	Male Y	222	226	266	274	112	112	161	161	157	189	135	135			139	143	144	152	254	286
27	2009	Family J, Ind-12	Female B	Male Y	222	226	266	266	112	112	161	165	181	189	135	135	256	260	139	139	152	152	254	282
28	2009	Family J, Ind-13	Female B	Male Y	222	226	266	274	112	112	161	161	157	165	135	151	244	260	139	139	152	152	254	282
29	2009	Family J, Ind-14	Female B	Male Y	222	226	266	266	112	112	161	165	157	165	135	135	256	260	139	139	152	152	254	286
30	2009	Family J, Ind-15	Female B	Male Y	218	222	266	274	112	112	161	165	157	189	135	135	256	260	139	139	144	152	254	286
31	2010	Female#4 x Male#1, Ind-P	Female#4	Male#1	218	226	266	266	112	124	165	165	157	185	135	135	248	256	139	139	144	152	254	286
32	2010	Female#4 x Male#1, Ind-S	Female#4	Male#1	222	226	266	266	112	112	165	165	173	185	135	151	248	256	139	139	144	144	254	254
33	2010	Female#4 x Male#4, Ind-C	Female#4	Male#4	226	226	266	266	112	124	165	165	173	173	135	151	248	256	139	143	144	160	254	254
34	2010	Female#4 x Male#4, Ind-G	Female#4	Male#4	226	226	266	266	112	124	165	165	157	165	135	151	248	260	139	139	144	144	254	254
35	2010	Female#4 x Male#5, Ind-K	Female#4	Male#5	226	226	262	266	112	132	165	165	173	181	151	151	248	256	143	143	144	152	254	262
36	2010	Female#4 x Male#5, Ind-N	Female#4	Male#5	218	226	262	266	112	124	165	165	157	181	151	151	248	248	139	143	152	152	262	286
37	2010	Female#4 x Male#8, Ind-I	Female#4	Male#8	218	226	262	266			165	165	157	173	135	135	248	260	139	143			254	286
38	2010	Female#4 x Male#8, Ind-L	Female#4	Male#8	218	226	262	266	112	128	161	165	173	181	135	135	256	260	139	143	124	152	254	254
39	2010	Female#4 x Male#9, Ind-O	Female#4	Male#9	218	222	262	266	112	132	165	165	173	181	135	151	248	256	139	143	144	152	254	282
40	2010	Female#4 x Male#9, Ind-R	Female#4	Male#9	218	226	266	274	112	124	161	165	157	181	151	151	248	256	139	143	144	144	254	282
41	2010	Female#5 x Male#1, Ind-A	Female#5	Male#1	226	226	266	266	112	132	165	165	181	185	135	135	256	256	139	139	144	144	254	262
42	2010	Female#5 x Male#1, Ind-E	Female#5	Male#1	226	226	266	266	112	132	165	165	165	185	135	135	256	256	139	139	124	144	254	258
43	2010	Female#5 x Male#4, Ind-D	Female#5	Male#4	226	226	262	266	112	128	165	165	165	165	135	151	244	256	139	139	144	144	258	262
44	2010	Female#5 x Male#4, Ind-H	Female#5	Male#4	226	226	262	266	112	132	165	165	165	165	135	151	244	260	139	139	124	160	254	258
45	2010	Female#5 x Male#5, Ind-B	Female#5	Male#5	226	226	266	274	112	128	161	165	181	181	135	151	244	256	139	143	124	144	262	262
46	2010	Female#5 x Male#5, Ind-F	Female#5	Male#5	226	226	266	266	112	128	165	165	165	181	135	151	256	256	139	143	124	144	262	262
47	2010	Female#5 x Male#8, Ind-Q	Female#5	Male#8	222	226	262	266	128	128	161	165	157	165	135	135	244	256	139	139	124	144	254	258
48	2010	Female#5 x Male#8, Ind-T	Female#5	Male#8	218	226	262	266	128	132	161	165	157	157	135	135	244	256	139	139			262	262
49	2010	Female#5 x Male#9, Ind-J	Female#5	Male#9	222	226	266	274	132	132	161	165	165	181	135	135	244	256	139	139	144	144	258	262
50	2010	Female#5 x Male#9, Ind-M	Female#5	Male#9	226	226	266	274	124	128	165	165	157	181	135	135	256	256	139	139	144	144	258	282

## Sheet: Adult Data
Original Order	Fish #	Location	Zone	Date	Fork Length	Total Length	Weight (g)	Sex	Floy Tag	Genotyped	Included in genetic analysis	AfuG74	AfuG74-2	AfuG56	AfuG56-2	Afu68	Afu68-2	AfuG195	AfuG195-2	Afu68b	Afu68b-2	AfuG160	AfuG160-2	AfuG112	AfuG112-2	AfuG63	AfuG63-2	AfuG9	AfuG9-2	Spl120	Spl120-2
1	1	Upstream	C	2009-05-25	1080	1217	13181.8		NSC 91026
2	2	Upstream	C	2009-05-25	1045	1160	10000		NSC 91027
3	3	Upstream	C	2009-05-25	918	1025	5454.55		NSC 91028
4	4	Upstream	C	2009-05-25	895	994	5000		NSC 82395
5	5	Upstream	C	2009-05-25	952	1063	8636.36		NSC 88020
6	6	Upstream	C	2009-05-25	944	1041	6363.64		NSC 91029
7	7	Upstream	C	2009-05-25	800	880	4090.91		NSC 91030
8	8	Upstream	C	2009-05-25	958	1080	6363.64		NSC 91031
9	9	Upstream	C	2009-05-25	833	937	4545.45		NSC 91032
10	10	Upstream	C	2009-05-25	1028	1150	10000		NSC 91033
11	11	Upstream	C	2009-05-26	915	997	5454.55	Male	NSC 91034	Yes	Yes	222	222	266	274	112	112	161	165	181	181	135	135	260	260	139	139	152	152	262	262
12	12	Upstream	C	2009-05-26	1300	1440	14090.9		NSC 91035
13	13	Upstream	C	2009-05-26	948	1068	7727.27	Male	NSC 88020	Yes	Yes	222	226	262	266	112	112	161	161	165	173	135	135	244	248	135	139	124	144	286	286
14	14	Upstream	C	2009-05-26	1220	1350	15454.5	Female	NSC 91036	Yes	Yes	222	226	262	266	112	112	161	165	177	181	135	135	244	256	139	143	144	152	254	262
15	16	Upstream	C	2009-05-26	875	981	5000	Male	NSC 91039
16	17	Upstream	C	2009-05-26	829	922	4090.91		NSC 91037
17	18	Upstream	C	2009-05-26	851	957	5000	Male	NSC 87137
18	19	Upstream	C	2009-05-26	829	938	4090.91	Male	NSC 91038
19	20	Upstream	C	2009-05-26	971	1080	7727.27		NSC 91046
20	21	Upstream	C	2009-05-26	963	1067	8863.64	Female	NSC 91044	Yes	Yes	218	218	266	266	112	112	161	165	157	177	135	147	256	256	139	139	144	152	262	286
21	22	Upstream	C	2009-05-26	1065	1144	9090.91	Male	NSC 91041	Yes	Yes	222	226	266	266	112	132	161	161	165	173	151	151	256	256	139	139	124	152	258	282
22	23	Upstream	C	2009-05-26	948	1055	6136.36	Male	NSC 87067	Yes	Yes	222	226	266	266	104	112	161	165	157	165	135	147	256	260	139	147	144	144	262	282
23	24	Upstream	C	2009-05-26	868	974	5000		NSC 91043
24	25	Upstream	C	2009-05-26	954	1065	7727.27	Female	NSC 91045	Yes	Yes	222	222	266	266	104	112	161	165	181	181	135	151	256	260	139	139	124	144	262	286
25	26	Upstream	C	2009-05-26	897	995	5681.82		NSC 86535
26	27	Upstream	C	2009-05-26	1106	1240	11363.6	Female	NSC 87667	Yes	Yes	222	226	262	266	104	112	161	161	157	177	135	135	244	244	139	143	124	152	262	286
27	28	Upstream	C	2009-05-26	1138	1276	14090.9	Female	NSC 91042	Yes	Yes	218	222	262	266	124	124	161	165	165	173	151	151	248	248	139	139	124	152	262	286
28	29	Upstream	C	2009-05-26	874	990	5227.27		NSC 75707
29	30	Upstream	C	2009-05-26	1295	1410	18181.8		NSC 91048
30	31	Upstream	C	2009-05-26	885	984	5000		NSC 91047
31	32	Upstream	C	2009-05-26	988	1112	6363.64	Male	NSC 91023	Yes	Yes	218	218	262	266	112	132	161	161	157	177	151	151	256	256	143	143	124	144	286	286
32	33	Upstream	C	2009-05-26	1120	1259	11136.4	Male	NSC 75720
33	34	Upstream	C	2009-05-26	1035	1152	8636.36		NSC 91024
34	35	Upstream	C	2009-05-26	980	1097	5909.09	Male	NSC 91025
35	36	Upstream	C	2009-05-26	935	1031	5000	Male	NSC 91050
36	37	Upstream	C	2009-05-26	895	1000	6136.36		NSC 82383
37	38	Upstream	C	2009-05-26	997	1110	7272.73	Male	NSC 91049
38	39	Upstream	C	2009-05-26	843	956	5000	Male	NSC 91022
39	40	Upstream	C	2009-05-26	1200	1340	15909.1	Female	NSC 91021
40	41	Upstream	C	2009-05-26	1044	1161	8863.64		NSC 91020
41	42	Upstream	C	2009-05-26	1105	1235	10000		NSC 91016
42	43	Upstream	C	2009-05-26	1050	1165	9545.45		NSC 91019
43	44	Upstream	C	2009-05-26	980	1097	9090.91		NSC 86082
44	45	Upstream	C	2009-05-26	924	1030	5454.55		NSC 79769
45	46	Upstream	C	2009-05-26	957	1067	6818.18		NSC 91018
46	47	Upstream	C	2009-05-26	1005	1105	8181.82	Male	NSC 86072
47	48	Upstream	C	2009-05-26	1006	1141	9318.18		NSC 91017
48	49	Upstream	C	2009-05-26	980	1082	7045.45	Male	NSC 91015	Yes	Yes	218	226	262	274	112	112	161	165	165	177	135	135	256	260	135	139	144	152	286	286
49	50	Upstream	C	2009-05-26	1170	1283	13181.8	Female	NSC 91014
50	51	Upstream	C	2009-05-26	910	1022	6363.64	Male	NSC 86533	Yes	Yes	222	226	266	266	104	112	165	165	157	165	135	151	244	256	139	143	144	152	254	286
51	52	Upstream	C	2009-05-26	1085	1202	12272.7	Female	NSC 91013	Yes	Yes	222	222	266	274	104	112	161	165	177	181	135	135	256	256	139	143	144	152	262	286
52	53	Upstream	C	2009-05-26	945	1051	6818.18		NSC 91012
53	54	Upstream	C	2009-05-26	1008	1138	7727.27		NSC 91006
54	55	Upstream	C	2009-05-26	842	954	4090.91		NSC 91004
55	56	Upstream	C	2009-05-26	915	1016	5454.55		NSC 91008
56	57	Upstream	C	2009-05-26	986	1094	6818.18	Male	NSC 91007	Yes	Yes	226	226	262	266	104	112	161	165	177	181	151	151	256	256	135	139	144	152	254	286
57	58	Upstream	C	2009-05-26	805	911	4318.18		NSC 91003
58	59	Upstream	C	2009-05-26	844	951	4318.18		NSC 91005
59	60	Upstream	C	2009-05-26	942	1049	7045.45		NSC 91011
60	61	Upstream	C	2009-05-26	919	1039	7045.45		NSC 87669
61	62	Upstream	C	2009-05-26	975	1067	5909.09	Male	NSC 91009	Yes	Yes	222	226	266	266	104	112	165	165	173	181	135	151	252	260	139	139	144	152	262	282
62	63	Upstream	C	2009-05-26	1126	1250	12500	Female	NSC 91010	Yes	Yes	222	222	266	266	112	124	161	165	157	165	135	135	244	248	139	139	144	160	282	286
63	64	Upstream	C	2009-05-26	618	699			NSC 91001
64	65	Upstream	C	2009-05-26	910	1014	5454.55	Male	NSC 86541	Yes	Yes	222	222	262	262	108	112	161	161	181	189	147	151	252	256	139	139	144	144	262	286
65	66	Upstream	C	2009-05-26	876	968	4090.91		NSC 91002
66	67	Upstream	C	2009-05-26	1118	1245	12272.7		NSC 91726
67	68	Upstream	C	2009-05-26	1140	1250	10909.1		NSC 91727
68	69	Upstream	C	2009-05-26	1165	1290	11363.6		NSC 91728
69	70	Upstream	C	2009-05-26	986	1096	5681.82	Male	NSC 91007
70	71	Upstream	C	2009-05-26	1055	1167	8181.82		NSC 91020
71	72	Upstream	C	2009-05-26	942	1054	6590.91		NSC 91729
72	73	Upstream	C	2009-05-26	970	1083	5909.09		NSC 91731
73	74	Upstream	C	2009-05-26	810	894	4545.45		NSC 91730
74	75	Upstream	C	2009-05-26	1390	1540	27272.7	Female	NSC 91732
75	76	Upstream	C	2009-05-27	918	1021	5454.55		NSC 91735
76	77	Upstream	C	2009-05-27	997	1106	7272.73	Male	NSC 91049
77	78	Upstream	C	2009-05-27	1039	1150	8181.82		NSC 91734
78	79	Upstream	C	2009-05-27	1033	1137	7272.73	Male	NSC 91737
79	80	Upstream	C	2009-05-27	950	1045	5454.55	Male	NSC 91740
80	81	Upstream	C	2009-05-27	814	914	5000		NSC 74622
81	82	Upstream	C	2009-05-27	956	1067	6136.36		NSC 91736
82	83	Upstream	C	2009-05-27	1037	1150	6363.64	Male	NSC 91738
83	84	Upstream	C	2009-05-27	1051	1172	7727.27		NSC 91741
84	85	Upstream	C	2009-05-27	1106	1238	9318.18	Male	NSC 91742
85	86	Upstream	C	2009-05-27		965	9090.91	Male	NSC 91743
86	87	Upstream	C	2009-05-27	825	905	3863.64	Male	NSC 91744
87	88	Upstream	C	2009-05-27	895	1001	3636.36	Male	NSC 91739	Yes	Yes	222	222	266	266	108	112	161	165	157	181	135	147	244	244	139	139	152	152	254	262
88	89	Upstream	C	2009-05-27	919	1035	6363.64	Male	NSC 91745	Yes	Yes	218	226	266	266	112	124	161	165	157	165	151	151	256	256	139	143	152	152	262	282
89	90	Upstream	C	2009-05-27	925	1041	5909.09	Male	NSC 86065	Yes	Yes	226	226	266	266	108	112	161	165	165	177	151	151	256	256	139	139	152	152	262	286
90	91	Upstream	C	2009-05-27	996	1106	7727.27	Male	NSC 81838	Yes	Yes	222	226	266	266	108	112	161	161	177	181	135	135	252	256	139	139	124	152	254	256
91	92	Upstream	C	2009-05-27	870	988	5000	Male	NSC 75649	Yes	Yes	226	226	262	266	104	112	161	165	165	177	135	135	244	256	139	139	124	152	262	286
92	93	Upstream	C	2009-05-27	862	961	4318.18		NSC 91733
93	94	Upstream	C	2009-05-27	1098	1206	10454.5	Female	NSC 91746	Yes	Yes	222	226	266	266	112	132	161	165	165	173	151	151	248	256	139	143	144	152	254	282
94	95	Upstream	C	2009-05-27	1086	1197	12045.5	Female	NSC 91747	Yes	Yes	218	222	266	274	108	128	161	165	165	189	135	151	244	248	139	143	144	152	262	286
95	96	Upstream	C	2009-05-27	1070	1190	10000	Female	NSC 82148
96	97	Upstream	C	2009-05-27	858	960	5000	Male	NSC 91749
97	98	Upstream	C	2009-05-27					NSC 91016
98	99	Upstream	C	2009-05-27	985	1098	6136.36		NSC 91750
99	100	Upstream	C	2009-05-27	935	1020	6136.36		NSC 91748
100	101	Upstream	C	2009-05-27	849	963	5454.55	Male	NSC 91976
101	102	Upstream	C	2009-05-27	990	1100	6363.64	Male	NSC 87062
102	103	Upstream	C	2009-05-27	895	991	5681.82	Male	NSC 79789
103	104	Upstream	C	2009-05-27				Male	NSC 91015
104	105	Upstream	C	2009-05-27	937	1031	6590.91	Male	NSC 91978
105	106	Upstream	C	2009-05-27					NSC 91019
106	107	Upstream	C	2009-05-27	1190	1333	15681.8	Female	NSC 91979
107	108	Upstream	C	2009-05-27	891	998	5454.55	Male	NSC 91980	Yes	Yes	218	226	262	274	112	112	161	161	165	177	147	147	256	260	139	147	144	152	282	286
108	109	Upstream	C	2009-05-27				Male	NSC 91009
109	110	Upstream	C	2009-05-27	1004	1106	8181.82		NSC 86072
110	111	Upstream	C	2009-05-27	1030	1134	7500	Male	NSC 87755	Yes	Yes	222	226	266	266	112	152	161	165	173	173	135	151	244	244	135	139	144	152	262	286
111	112	Upstream	C	2009-05-27	1152	1246	10000		NSC 91977
112	113	Upstream	C	2009-05-27					NSC 91011
113	114	Upstream	C	2009-05-27	1040	1160	8636.36		NSC 91981
114	115	Upstream	C	2009-05-27	1050	1161	8863.64	Male	NSC 91982	Yes	Yes	226	226	262	266	112	112	161	161	181	181	147	151	244	256	139	139	124	152	262	286
115	116	Upstream	C	2009-05-27	860	981	5000	Male	NSC 87624	Yes	Yes	226	226	266	274	112	112	161	161	165	165	135	135	256	260	139	139	124	152	286	286
116	117	Upstream	C	2009-05-27					NSC 91004
117	118	Upstream	C	2009-05-27				Male	NSC 91018	Yes	Yes	222	222	262	266	112	112	161	165	157	181	135	135	244	256	139	139	144	144	262	282
118	119	Upstream	C	2009-05-27	1053	1178	8863.64		NSC 63123
119	120	Upstream	C	2009-05-27					NSC 91006
120	121	Upstream	C	2009-05-28	914	1014	4772.73		NSC 91983
121	122	Upstream	C	2009-05-28	1329	1431	16818.2	Female	NSC 91984	Yes	Yes	222	226	266	274	104	112	161	165	157	177	135	135	244	256	139	143	124	144	262	286
122	123	Upstream	C	2009-05-28	950	1064	5909.09		NSC 91987
123	124	Upstream	C	2009-05-28	1165	1260	11363.6		NSC 91985
124	125	Upstream	C	2009-05-28	1140	1268	14772.7	Female	NSC 76597	Yes	Yes	222	222	266	274	104	112	161	161	165	189	135	135	260	260	139	139	152	152	254	286
125	126	Upstream	C	2009-05-28	1102	1231			White 0613
126	127	Upstream	C	2009-05-28	1059	1176	8636.36		NSC 86520
127	128	Upstream	C	2009-05-28	960	1068	6136.36	Male	NSC 91988
128	129	Upstream	C	2009-05-28	1044	1144	7954.55		NSC 87514
129	130	Upstream	C	2009-05-28	1032	1147	8636.36		NSC 86537
130	131	Upstream	C	2009-05-28	811	930	3181.82	Male	NSC 91990
131	132	Upstream	C	2009-05-28	926	1022	6363.64	Male	NSC 91989
132	133	Upstream	C	2009-05-28	916	1025	5227.27		NSC 87128
133	134	Upstream	C	2009-05-28	1015	1222	10909.1		NSC 91991
134	135	Upstream	C	2009-05-28	930	1010	6590.91	Male	NSC 86195
135	138	Upstream	C	2009-05-28	856	940	4090.91		NSC 91992
136	139	Upstream	C	2009-05-28				Male	NSC 91982
137	140	Upstream	C	2009-05-28	893	994	5454.55	Male	NSC 91994
138	141	Upstream	C	2009-05-28	925	1035	5681.82		NSC 91993
139	142	Upstream	C	2009-05-28	864	971	6136.36		NSC 91995
140	143	Upstream	C	2009-05-28	1115	1217	9090.91		NSC 87132
141	144	Upstream	C	2009-05-28	1175	1299	11136.4		NSC 91998
142	145	Upstream	C	2009-05-28	1038	1146	10000		NSC 91997
143	146	Upstream	C	2009-05-28	915	1015	6136.36		NSC 92000
144	147	Upstream	C	2009-05-28	1074	1120	10227.3		NSC 91999
145	148	Upstream	C	2009-05-28	1130	1236	10227.3		NSC 91975
146	149	Upstream	C	2009-05-28	1015	1122	9545.45		NSC 91971
147	150	Upstream	C	2009-05-28	983	1076	6363.64		NSC 91974
148	151	Upstream	C	2009-05-28	924	1035	5454.55	Male	NSC 91973
149	152	Upstream	C	2009-05-28	802	906	6136.36		NSC 91972
150	153	Upstream	C	2009-05-28	913	1042	5681.82		NSC 91969
151	154	Upstream	C	2009-05-28	750	824	2727.27		NSC 91970
152	155	Upstream	C	2009-05-28	1189	1305	13181.8	Female	NSC 91968	Yes	Yes	218	222	266	266	112	112	161	165	157	181	135	151	256	260	139	147	124	152	262	286
153	156	Upstream	C	2009-05-29	923	1016	5227.27	Male	NSC 91963	Yes	Yes	222	226	274	274	112	132	161	165	157	165	135	151	256	260	139	139	144	152	262	286
154	157	Upstream	C	2009-05-29	1104	1220	10681.8		NSC 91965
155	158	Upstream	C	2009-05-29	927	1037	5000	Male	NSC 91960	Yes	Yes	222	222	266	274	104	112	161	161	157	181	135	135	256	256	139	139	124	124	262	286
156	159	Upstream	C	2009-05-29	1118	1240	11136.4		NSC 91967
157	160	Upstream	C	2009-05-29	855	951	5227.27		NSC 77110
158	161	Upstream	C	2009-05-29	1069	1214	7954.55		NSC 91966
159	162	Upstream	C	2009-05-29	946	1080	5681.82	Male	NSC 91958	Yes	Yes	218	222	266	274	108	112	161	165	173	201	135	135	248	260	135	139	144	152	282	286
160	163	Upstream	C	2009-05-29	985	1091	7500	Male	NSC 88542	Yes	Yes	222	226	262	266	112	112	161	165	165	201	135	135	244	256	139	139	144	152	286	286
161	164	Upstream	C	2009-05-29	970	1094	7954.55		NSC 91959
162	165	Upstream	C	2009-05-29	896	1005	5000		NSC 91964
163	166	Upstream	C	2009-05-29	953	1055	5454.55		NSC 91957
164	167	Upstream	C	2009-05-29	1158	1293	10909.1		NSC 91955
165	168	Upstream	C	2009-05-29	794	886	3409.09	Male	NSC 91956	Yes	Yes	226	226	266	266	108	112	161	165	181	189	151	151	256	260	139	143	124	152	254	254
166	169	Upstream	C	2009-05-29	873	987	4318.18	Male	NSC 88029	Yes	Yes	222	226	266	266	112	124	161	165	165	181	135	151	256	260	139	147	144	152	282	286
167	170	Upstream	C	2009-05-29	921	1021	6136.36		NSC 92000
168	171	Upstream	C	2009-05-29	842	941	4772.73	Male	NSC 91953	Yes	Yes	222	226	266	274	108	124	161	165	181	181	135	151	256	260	139	143	152	152	262	286
169	172	Upstream	C	2009-05-29	1015	1125	7954.55		NSC 87679
170	173	Upstream	C	2009-05-29	855	960	5000		NSC 91952
171	174	Upstream	C	2009-05-29	840	940	3181.82		NSC 91954
172	175	Upstream	C	2009-05-29					White 0613
173	176	Upstream	C	2009-05-29	1077	1192	8181.82		NSC 88030
174	177	Upstream	C	2009-05-29	1100	1220	11818.2	Male	NSC 91951
175	178	Upstream	C	2009-05-29	900	944	5000		NSC 77046
176	179	Upstream	C	2009-05-29	905	1011	5681.82	Male	NSC 91349
177	180	Upstream	C	2009-05-29	1014	1123	7500	Male	NSC 91346
178	181	Upstream	C	2009-05-29	930	1049	5454.55		NSC 91345
179	182	Upstream	C	2009-05-29	1101	1220	5681.82		NSC 86052
180	183	Upstream	C	2009-05-29	1072	1196	8181.82		NSC 91348
181	184	Upstream	C	2009-05-29	1015	1140	7954.55	Female	NSC 91347	Yes	Yes	226	226	266	266	112	112	165	165	173	181	135	151	256	256	139	139	124	152	262	286
182	185	Upstream	C	2009-05-29	879		4090.91	Male	NSC 91344
183	186	Upstream	C	2009-05-29	906	1017	5000		NSC 91350
184	187	Upstream	C	2009-05-29	982	1093	8181.82	Female	NSC 86082	Yes	Yes	222	226	266	274	112	112	161	161	189	189	135	135	256	256	143	143	144	152	262	280
185	188	Upstream	C	2009-05-29					NSC 91048
186	189	Upstream	C	2009-05-29	850	955	3409.09		NSC 91952
187	190	Upstream	C	2009-05-29	970	1065	7727.27	Male	NSC 86059
188	191	Upstream	C	2009-05-29	920	1026	6363.64	Male	NSC 91343
189	192	Upstream	C	2009-05-29	980	1086	6590.91	Male	NSC 91341	Yes	Yes	222	226	266	266	112	112	161	165	157	189	135	135	244	256	135	143	144	152	280	286
190	193	Upstream	C	2009-05-29	1115	1233			NSC 91991
191	194	Upstream	C	2009-05-29	1050	1179	11136.4		NSC 91342
192	195	Upstream	C	2009-05-29	1062	1161	9318.18		NSC 91339
193	196	Upstream	C	2009-05-29	850	951	5454.55	Female	NSC 91337	Yes	Yes	222	226	266	266	112	124	161	165	157	181	135	151			139	143	152	152	262	262
194	197	Upstream	C	2009-05-29	906	1014	5909.09	Male	NSC 86513	Yes	Yes	222	222	266	266	104	112	161	165	181	181	135	151	256	256	139	139	124	152	282	286
195	198	Upstream	C	2009-05-29	1140	1254	11590.9		NSC 91340
196	199	Upstream	C	2009-05-29	807	917	3863.64	Male	NSC 91338	Yes	Yes	218	226	266	266	112	132	161	165	165	177	147	151	248	260	139	147	144	152	262	282
197	200	Upstream	C	2009-05-29				Male	NSC 88029
198	201	Upstream	C	2009-05-29	1096	1214	9545.45		NSC 91334
199	202	Upstream	C	2009-05-29	920	1004	5454.55	Male	NSC 91336	Yes	Yes	222	226	266	266	112	112	161	165	157	181	135	151	244	256	139	139	124	144	258	286
200	203	Upstream	C	2009-05-29	1150	1288	12727.3		NSC 91335
201	204	Upstream	C	2009-05-29					NSC 87658
202	205	Upstream	C	2009-05-29	1030	1131	7500		NSC 87755
203	206	Upstream	C	2009-05-29	1070	1194	9090.91		NSC 75708
204	207	Upstream	C	2009-05-29					NSC 91016
205	208	Upstream	C	2009-05-29	1002	1114	7954.55		NSC 91332
206	209	Upstream	C	2009-05-29	1100	1215	10909.1		NSC 74617
207	210	Upstream	C	2009-05-29	1028	1154	10454.5		NSC 82150
208	211	Upstream	C	2009-05-29	987	1106	8636.36		NSC 87061
209	212	Upstream	C	2009-05-29	1062	1177	8636.36		NSC 86520
210	213	Upstream	C	2009-05-29					NSC 91997
211	214	Upstream	C	2009-05-29	1122	1215	10909.1	Male	NSC 87132	Yes	Yes	226	226	262	266	112	112	161	165	165	181	135	135	244	260	139	139	152	152	262	282
212	215	Upstream	C	2009-05-29	1260	1387	17727.3	Female	NSC 91333
213	216	Upstream	C	2009-05-29	1054	1155	8181.82		NSC 84871
214	217	Upstream	C	2009-05-29	1133	1252	11136.4		NSC 91331
215	218	Upstream	C	2009-05-29	855	965	4772.73		NSC 91329
216	219	Upstream	C	2009-05-29				Male	NSC 88029
217	220	Upstream	C	2009-05-29	1220	1346	15909.1	Female	NSC 91330
218	221	Upstream	C	2009-05-29	1140	1268	14772.7	Female	NSC 76597
219	222	Upstream	C	2009-05-30	877	987	4545.45	Male	NSC 88029
220	223	Upstream	C	2009-05-30	891	1007	4545.45		NSC 91328
221	224	Upstream	C	2009-05-30	907	1017	5227.27		NSC 91327
222	225	Upstream	C	2009-05-30	862	972		Male	NSC 91043	Yes	Yes	222	226	262	266	112	128	161	165	157	173	135	151	244	256	139	139	144	156	262	286
223	226	Upstream	C	2009-05-30					NSC 91331
224	227	Upstream	C	2009-05-30	1100	1216	9090.91	Female	NSC 74617	Yes	Yes	222	222	266	274	112	124	161	161	157	181	135	135	256	256	139	143	144	144	254	254
225	228	Upstream	C	2009-05-30				Male	NSC 91973
226	229	Upstream	C	2009-05-30	1008	1136	7272.73	Male	NSC 91326
227	230	Upstream	C	2009-05-30	1055	1140	9090.91		NSC 91301
228	231	Upstream	C	2009-05-30	975	1100	7272.73		NSC 91305
229	232	Upstream	C	2009-05-30					NSC 91019
230	233	Upstream	C	2009-05-30	1095	1199	9545.45		NSC 91304
231	234	Upstream	C	2009-05-30	1070	1169	9545.45		NSC 91302
232	235	Upstream	C	2009-05-30	1127	1217	10227.3	Male	NSC 87132
233	236	Upstream	C	2009-05-30				Male	NSC 91740
234	237	Upstream	C	2009-05-30	1297	1400	16363.6		NSC 91303
235	238	Upstream	C	2009-05-30				Female	NSC 91045
236	239	Upstream	C	2009-05-30					NSC 91301
237	240	Upstream	C	2009-05-30	891	987	5681.82		NSC 91307
238	241	Upstream	C	2009-05-30					NSC 91975
239	242	Upstream	C	2009-05-30	1170	1278	14090.9	Female	NSC 91308	Yes	Yes	222	226	262	274	112	124	161	161	173	189	151	151	256	260	143	143	144	152	262	286
240	243	Upstream	C	2009-05-31	932	1021	6363.64		NSC 91311
241	244	Upstream	C	2009-05-31					NSC 91734
242	245	Upstream	C	2009-05-31	1030	1159	8636.36	Male	NSC 91312
243	246	Upstream	C	2009-05-31	899	995	5454.55		NSC 91313
244	247	Upstream	C	2009-05-31	970	1081	8409.09		NSC 87126
245	248	Upstream	C	2009-05-31	1080	1193	8181.82		NSC 91309
246	249	Upstream	C	2009-05-31				Male	NSC 91038
247	250	Upstream	C	2009-05-31	993	1106	7500	Male	NSC 91314
248	251	Upstream	C	2009-05-31	828	9309	4090.91	Male	NSC 91315
249	252	Upstream	C	2009-05-31	1048	1163	9545.45	Female	NSC 91319	Yes	Yes	222	226	266	266	112	132	161	165	165	181	147	151	256	260	139	139	144	152	254	282
250	253	Upstream	C	2009-05-31				Male	NSC 91989
251	254	Upstream	C	2009-05-31	1132	1267	12045.5	Female	NSC 91320	Yes	Yes	218	226	266	266	104	112	161	165	165	177	151	151	244	244	139	139	124	152	280	280
252	255	Upstream	C	2009-05-31	996	1117	7727.27	Female	NSC 85371	Yes	Yes	222	222	266	266	112	112	165	165	173	177	135	147	260	260	139	139	152	152	284	284
253	256	Upstream	C	2009-05-31				Female	NSC 91012	Yes	Yes	222	226	266	274	112	112	161	161	177	181	135	135	256	260	139	147	144	152	254	286
254	257	Upstream	C	2009-05-31	910	1019	5681.82		NSC 91321
255	258	Upstream	C	2009-05-31	917	1025	5681.82	Male	NSC 91310	Yes	Yes	222	226	266	274	104	112	161	165	157	181	135	151	256	256	139	139	144	144	262	262
256	259	Upstream	C	2009-05-31					NSC 91985
257	260	Upstream	C	2009-05-31	950	1059	6590.91		NSC 91316
258	261	Upstream	C	2009-05-31	1033	1125	10681.8	Male	NSC 91322	Yes	Yes	218	222	266	266	112	112	161	165	165	173	135	151	256	260	139	139	124	144	262	286
259	262	Upstream	C	2009-05-31	1045	1175	9772.73		NSC 91318
260	263	Upstream	C	2009-05-31	895	1000	5909.09		NSC 91317
261	264	Upstream	C	2009-05-31				Female	NSC 74617
262	265	Upstream	C	2009-05-31					NSC 91975
263	266	Upstream	C	2009-05-31	1120	1222	12045.5	Female	NSC 91323	Yes	Yes	226	226	266	266	112	132	161	161	181	189	135	151	244	256	139	139	124	144	262	286
264	267	Upstream	C	2009-05-31	1054	1167	8863.64	Male	NSC 91325	Yes	Yes	226	226	266	266	112	124	161	165	173	189	135	151	256	256	139	139	144	152	262	286
265	268	Upstream	C	2009-05-31	1010	1144	7727.27		NSC 91901
266	269	Upstream	C	2009-05-31	895	1004	5681.82	Male	NSC 82383
267	270	Upstream	C	2009-05-31				Male	NSC 91034
268	271	Upstream	C	2009-05-31	1071	1183	9545.45	Male	NSC 82375
269	272	Upstream	C	2009-05-31	1085	1182	13181.8	Female	NSC 91906
270	273	Upstream	C	2009-05-31	846	951	3409.09	Male	NSC 91907
271	274	Upstream	C	2009-05-31					NSC 91959
272	275	Upstream	C	2009-05-31	1056	1165	9545.45	Male	NSC 91902	Yes	Yes	226	226	262	266	112	112	161	161	157	157	147	151	244	260	139	147	144	144	258	258
273	276	Upstream	C	2009-05-31	804	901	3181.82	Male	NSC 91908
274	277	Upstream	C	2009-05-31	1255	1413	16818.2	Female	NSC 74602	Yes	Yes	226	226	266	266	112	112	161	165	165	181	135	135	252	256	139	143	144	144	262	286
275	278	Upstream	C	2009-05-31	1020	1145	9545.45	Female	NSC 91909	Yes	Yes	218	222	266	266	112	112	161	161	165	173	135	135	256	260	139	139	152	152	254	286
276	279	Upstream	C	2009-05-31	1176	1309	14318.2	Female	NSC 91904	Yes	Yes	222	226	266	266	108	112	161	165	165	181	135	151	244	260	135	143	144	152	262	262
277	280	Upstream	C	2009-05-31	1082	1216	10454.5		NSC 91903
278	281	Upstream	C	2009-05-31				Female	NSC 91308
279	282	Upstream	C	2009-05-31	1017	1136	8409.09	Male	NSC 91905	Yes	Yes	226	226	266	274	112	112	161	165	173	181	135	151	256	260	139	139	144	156	262	286
280	283	Upstream	C	2009-05-31	1140	1262	16136.4	Female	NSC 91910	Yes	Yes	218	226	266	266	104	112	161	161	157	177	135	135	244	248	139	139	144	152	284	284
281	284	Upstream	C	2009-05-31	880	976	5000	Male	NSC 91914	Yes	Yes	226	226	266	274	112	132	161	165	157	181	135	135	244	248	139	139	144	144	262	284
282	285	Upstream	C	2009-05-31	1027	1144	8636.36		NSC 82392
283	286	Upstream	C	2009-05-31	871	985	5227.27		NSC 91911
284	287	Upstream	C	2009-05-31	866	955	5227.27	Male	NSC 91913	Yes	Yes	222	226	262	274	108	112	165	165	165	177	135	135	244	244	139	139	144	152	280	286
285	288	Upstream	C	2009-05-31	937	1034	6818.18	Male	NSC 91912	Yes	Yes	226	226	266	274	112	112	161	165	165	189	135	151	256	260	135	143	144	152	262	286
286	289	Upstream	C	2009-05-31				Female	NSC 87667
287	289.5	Upstream	C	2009-06-01				Female	NSC 91012
288	290	Upstream	C	2009-06-01	900	1012	6590.91	Male	NSC 91917
289	291	Upstream	C	2009-06-01	909	1026	6590.91		NSC 91915
290	292	Upstream	C	2009-06-01	825	942	4318.18	Male	NSC 91916
291	293	Upstream	C	2009-06-01					NSC 91967
292	294	Upstream	C	2009-06-01	870	1001	4318.18	Male	NSC 76593
293	295	Upstream	C	2009-06-01	980	1102	8636.36		NSC 91918
294	296	Upstream	C	2009-06-01				Female	NSC 91316	Yes	Yes	222	226	266	266	112	112	161	161	157	181	135	135	244	256	139	143	124	152	254	262
295	297	Upstream	C	2009-06-01	985	1098	7272.73		NSC 91921
296	298	Upstream	C	2009-06-01	847	952	2727.27	Male	NSC 91920
297	299	Upstream	C	2009-06-01				Male	NSC 91317
298	300	Upstream	C	2009-06-01					NSC 91750
299	301	Upstream	C	2009-06-01	1024	1140	7272.73	Male	NSC 91919
300	302	Upstream	C	2009-06-01					NSC 91006
301	303	Upstream	C	2009-06-01	1162	1301	14772.7	Female	NSC 91922	Yes	Yes	218	226	266	266	112	112	161	165	177	189	151	151	256	256	139	143	144	152	282	286
302	304	Upstream	C	2009-06-01	891	992	5454.55	Female	NSC 91950	Yes	Yes	226	226	266	274	108	108	161	165	181	181	135	135	252	256	139	143	144	152	262	262
303	305	Upstream	C	2009-06-01	1209	1343	12727.3	Male	NSC 91923	Yes	Yes	222	226	262	262	112	112	161	161	181	181	135	151	248	252	139	139	124	144	286	286
304	306	Upstream	C	2009-06-01	1196	1314	15000	Female	NSC 91924	Yes	Yes	222	226	266	266	108	112	161	161	165	181	135	151	256	256	139	143	144	152	262	280
305	307	Upstream	C	2009-06-01	1342	1457	17272.7	Female	NSC 91925	Yes	Yes	226	226	262	266	112	112	161	165	157	173	135	151	244	256	139	143	144	144	254	284
306	308	Upstream	C	2009-06-01				Male	NSC 91011	Yes	Yes	218	218	266	266	108	112	161	161	177	181	135	135	244	256	139	139	144	152	262	286
307	309	Upstream	C	2009-06-01					NSC 91975
308	310	Upstream	C	2009-06-01				Male	NSC 91049
309	311	Upstream	C	2009-06-01	935	1041	6590.91		NSC 91949
310	312	Upstream	C	2009-06-01					NSC 91747
311	313	Upstream	C	2009-06-02					NSC 91950
312	314	Upstream	C	2009-06-02	1068	1200	10454.5		NSC 86510
313	315	Upstream	C	2009-06-02	855	973	4090.91	Male	NSC 74615	Yes	Yes	218	222	266	274	112	112	161	161	181	181	135	135	256	260	139	139	152	152	254	254
314	316	Upstream	C	2009-06-02	1200	1336	16590.9	Female	NSC 91947	Yes	Yes	222	226	262	262	112	132	161	165	165	181	135	135	256	260	139	143	144	152	262	286
315	317	Upstream	C	2009-06-02	914	1021	5454.55	Male	NSC 91948
316	318	Upstream	C	2009-06-02	875	972	5000	Male	NSC 56532
317	319	Upstream	C	2009-06-02	1162	1286	14090.9		NSC 91946
318	320	Upstream	C	2009-06-02				Female	NSC 91922
319	321	Upstream	C	2009-06-02					NSC 91035
320	322	Upstream	C	2009-06-02					NSC 91923
321	323	Upstream	C	2009-06-02	1033	1151	5454.55	Female	NSC 87700	Yes	Yes	222	226	266	266	112	112	165	165	173	181	135	151	256	256	139	139	144	144	262	286
322	324	Upstream	C	2009-06-02	1120	1214	9545.45	Male	NSC 91945
323	325	Upstream	C	2009-06-02	1056	1168	9545.45	Male	NSC 87752
324	326	Upstream	C	2009-06-02	811	908	2727.27	Male	NSC 91944
325	327	Upstream	C	2009-06-02	1100	1227	8181.82		NSC 82352
326	328	Upstream	C	2009-06-02	1019	1144	6363.64		NSC 91942
327	329	Upstream	C	2009-06-02				Female	NSC 91044
328	330	Upstream	C	2009-06-02	1015	1136	7727.27	Male	NSC 91941	Yes	Yes	222	226	266	266	112	124	161	165	165	181	135	135	256	260	139	139	124	144	262	286
329	331	Upstream	C	2009-06-02	1050	1165	8181.82	Male	NSC 86543	Yes	Yes	222	226	262	262	112	112	161	161	165	173	135	135	248	256	139	139			262	284
330	332	Upstream	C	2009-06-02	911	1014	5454.55		NSC 91940
331	333	Upstream	C	2009-06-02	964	1071	3181.82	Male	NSC 91943	Yes	Yes	218	222	266	274	112	132	161	165	173	189	151	151	256	260	139	143	144	152	262	282
332	334	Upstream	C	2009-06-02	889	982	5681.82	Male	NSC 91938	Yes	Yes	218	222	266	274	112	112	165	165	157	201	135	135	256	260	139	139	152	152	254	286
333	335	Upstream	C	2009-06-02	1290	1409	15681.8		NSC 91938
334	336	Upstream	C	2009-06-02	1181	1300	14545.5	Female	NSC 79786	Yes	Yes	218	218	266	266	112	112	165	165	165	189	135	151	244	260	139	139	124	144	258	262
335	337	Upstream	C	2009-06-02	1455		26818.2	Female	NSC 91932	Yes	Yes	222	226	266	266	112	132	161	165	157	181	135	135	256	260	139	139	124	144	254	286
336	338	Upstream	C	2009-06-02	1104	1214	9772.73	Female	NSC 91934	Yes	Yes	226	226	266	274	104	112	161	165	165	181	147	151	244	260	139	139	124	144	286	286
337	339	Upstream	C	2009-06-02	1062	1185	7272.73		NSC 91935
338	340	Upstream	C	2009-06-02	1082	1184	6818.18		NSC 75375
339	341	Upstream	C	2009-06-02	1106	1234	8409.09		NSC 82358
340	342	Upstream	C	2009-06-02	1114	1244	10681.8		NSC 87530
341	343	Upstream	C	2009-06-02	1060	1186	7272.73		NSC 91936
342	344	Upstream	C	2009-06-02	955	1067	5681.82	Male	NSC 91933
343	345	Upstream	C	2009-06-02	848	946	5454.55	Male	NSC 91937
344	346	Upstream	C	2009-06-02	1070	1185	7272.73		NSC 91931
345	347	Upstream	C	2009-06-02					NSC 91999
346	348	Upstream	C	2009-06-02				Female	NSC 91319
347	349	Upstream	C	2009-06-02	1130	1267	8636.36		NSC 91929
348	350	Upstream	C	2009-06-02	1235	1368	12727.3	Female	NSC 91930	Yes	Yes	222	222	266	274	112	124	161	165	173	173	135	135	256	260	143	143	152	152	258	286
349	351	Upstream	C	2009-06-02					NSC 91317
350	352	Upstream	C	2009-06-02	990	1103	8636.36		NSC 87145
351	353	Upstream	C	2009-06-02				Female	NSC 91968
352	354	Upstream	C	2009-06-02	1085	1189	7045.45		NSC 75375
353	355	Upstream	C	2009-06-02	857	954	3863.64		NSC 91928
354	356	Upstream	C	2009-06-02	858	967	5227.27	Male	NSC 76599
355	357	Upstream	C	2009-06-02	1207	1333	15454.5	Female	NSC 91926	Yes	Yes	226	226	262	266	112	112	161	165	165	165	135	135	256	260	135	139	144	152	262	286
356	358	Upstream	C	2009-06-02	1388	1507	15454.5		NSC 91927
357	359	Upstream	C	2009-06-03					NSC 91027
358	360	Upstream	C	2009-06-03				Male	NSC 91004
359	361	Upstream	C	2009-06-03	1027	1127	9090.91	Female	NSC 91275	Yes	Yes	218	226	262	266	112	132	161	161	157	181	135	151	244	248	139	143	144	152	282	286
360	363	Upstream	C	2009-06-03	1055	1155	9545.45	Male	NSC 84871	Yes	Yes	218	218	266	274	112	112	161	165	173	189	135	151	244	244	139	139	144	152	286	286
361	364	Upstream	C	2009-06-03					White 0614
362	365	Upstream	C	2009-06-03	1059	1164	11363.6	Female	NSC 91274	Yes	Yes	218	222	266	274	108	132	161	165	157	177	135	147	256	256	139	143	144	152	254	286
363	366	Upstream	C	2009-06-03				Female	NSC 91968
364	367	Upstream	C	2009-06-03	861	965	4545.45	Male	NSC 87548	Yes	Yes	222	226	274	274	112	112	165	165	157	181	135	151	256	256	139	139	124	144	262	282
365	368	Upstream	C	2009-06-03				Female	NSC 91006	Yes	Yes	222	226	266	274	112	112	161	161	165	189	135	151	244	256	139	139	124	152	262	282
366	369	Upstream	C	2009-06-03	1155	1285	10000	Female	NSC 91272	Yes	Yes	218	218	266	266	112	132	161	165	181	189	135	151	256	260	139	139	124	152	286	286
367	370	Upstream	C	2009-06-03	1196	1312	14318.2		NSC 91271
368	371	Upstream	C	2009-06-03	1230	1348	13409.1	Female	NSC 91270	Yes	Yes	226	226	266	266	112	112	161	165	165	173	135	151	244	256	139	139	124	144	262	286
369	372	Upstream	C	2009-06-03	1086	1194	10000		NSC 91269
370	373	Upstream	C	2009-06-03	1356	1490	17272.7	Female	NSC 91268	Yes	Yes	222	226	266	274	112	124	165	165	173	181	135	135	256	260	139	139	144	152	282	286
371	374	Upstream	C	2009-06-03				Male	NSC 91018
372	375	Upstream	C	2009-06-03				Male	NSC 91322
373	376	Upstream	C	2009-06-03	965	1078	6136.36	Male	NSC 88032
374	377	Upstream	C	2009-06-03				Male	NSC 91733
375	378	Upstream	C	2009-06-03	1007	1132	6818.18	Female	NSC 91266	Yes	Yes	222	222	266	274	112	132	161	165	157	181	135	135	256	256	139	139	144	144	262	282
376	379	Upstream	C	2009-06-03	1010	125	6136.36		NSC 91267
377	380.5	Upstream	C	2009-06-04	989	1105	17954.5	Male	NSC 91265
378	381	Upstream	C	2009-06-04	985	1083	5681.82	Male	NSC 91974
379	382	Upstream	C	2009-06-04	806	867	2954.55		NSC 91260
380	383	Upstream	C	2009-06-04	1100	1240	7272.73	Male	NSC 91742
381	384	Upstream	C	2009-06-04	891	980	5000		NSC 87539
382	385	Upstream	C	2009-06-04	903	1032	4772.73		NSC 91262
383	386	Upstream	C	2009-06-04	836	945	3636.36	Male	NSC 91261
384	387	Upstream	C	2009-06-04	1045	1168	8636.36		NSC 91264
385	388	Upstream	C	2009-06-04	1219	1374	16363.6	Female	NSC 74609	Yes	Yes	226	226	266	274	112	112	161	161	177	181	151	151	256	256	139	143	144	144	262	262
386	389	Upstream	C	2009-06-04	870	1003	4545.45	Male	NSC 76593
387	390	Upstream	C	2009-06-04	940	1050	4772.73	Male	NSC 91259	Yes	Yes	218	222	262	266	112	112	161	165	157	165	151	151	256	260	139	139	124	144	282	286
388	391	Upstream	C	2009-06-04	1055	1181	8636.36	Female	NSC 91256	Yes	Yes	226	226	262	274	112	112	161	161	181	189	135	151	256	260	139	143	144	152	254	286
389	392	Upstream	C	2009-06-04	900	1010	5000	Male	NSC 91258	Yes	Yes	218	226	266	266	112	112	161	165	157	181	135	151	244	256	139	143	144	152	282	286
390	393	Upstream	C	2009-06-04	1033	1137	7272.73	Male	NSC 91737
391	394	Upstream	C	2009-06-04	977	1076		Male	NSC 91257	Yes	Yes	222	222	262	266	112	112	161	165	157	165	135	135	256	256	139	139	124	152	254	258
392	395	Upstream	C	2009-06-04	900	1012	6590.91	Male	NSC 91917
393	396	Upstream	C	2009-06-04				Male	NSC 91952	Yes	Yes	218	218	266	266	112	132	161	161	177	189	135	151	256	260	139	139	152	152	282	286
394	397	Upstream	C	2009-06-04	1050	1146	7727.27	Male	NSC 91776	Yes	Yes	222	226	266	266	112	112	161	165	157	157	135	135	256	256	135	139	144	144	254	286
395	398	Upstream	C	2009-06-04	910	1021	5000	Male	NSC 87538	Yes	Yes	222	226	262	262	112	112	161	165	157	189	135	135	244	256	139	139	144	144	262	286
396	399	Upstream	C	2009-06-04	1188	1322	11136.4	Female	NSC 91777	Yes	Yes	222	222	266	266	108	112	161	165	173	189	151	151	256	256	143	143	144	152	262	282
397	400	Upstream	C	2009-06-04	1200	1316	14090.9		NSC 87060
398	401	Upstream	C	2009-06-04	968	1076	5000	Male	NSC 91778
399	402	Upstream	C	2009-06-04	843	984	3636.36	Male	NSC 91780
400	403	Upstream	C	2009-06-04				Male	NSC 91945
401	404	Upstream	C	2009-06-04	1234	1351	15681.8	Female	NSC 91779	Yes	Yes	222	226	266	266	112	112	165	165	173	189	135	135	256	256	139	139	124	144	286	286
402	405	Upstream	C	2009-06-05					NSC 79786
403	406	Upstream	C	2009-06-05	1048	1166	9545.45		NSC 91781
404	407	Upstream	C	2009-06-05				Female	NSC 91342
405	408	Upstream	C	2009-06-05	996	1098	6363.64		NSC 87668
406	409	Upstream	C	2009-06-05	715	820	2272.73	Male	NSC 91782
407	410	Upstream	C	2009-06-05	1110	1226	8636.36	Male	NSC 91784
408	411	Upstream	C	2009-06-05					NSC 91955
409	412	Upstream	C	2009-06-05	1244	1350	16363.6	Female	NSC 91783	Yes	Yes	222	226	266	266	108	112	161	165	165	181	135	151	248	256	135	143	144	152	282	286
410	413	Upstream	C	2009-06-05				Male	NSC 88020
411	414	Upstream	C	2009-06-05				Male	NSC 91745
412	415	Upstream	C	2009-06-05	1003	1099	6590.91	Female	NSC 91787	Yes	Yes	222	222	274	274	112	112	161	161	165	181	135	151	256	256	139	143	124	152	254	280
413	416	Upstream	C	2009-06-05	1187	1312	9772.73		NSC 91786
414	417	Upstream	C	2009-06-05	882	965	5227.27		NSC 91785
415	418	Upstream	C	2009-06-05	1060	1181	8181.82		NSC 63123
416	419	Upstream	C	2009-06-05	1259	1382	14545.5		NSC 82129
417	420	Upstream	C	2009-06-05	1272	1389	15681.8	Male	NSC 91790	Yes	Yes	222	226	266	266	104	112	161	161	165	185	135	147	256	256	139	139	152	152	254	286
418	421	Upstream	C	2009-06-05				Male	NSC 91735	Yes	Yes	226	226	266	274	112	112	161	165	181	181	135	135	252	252	139	139	124	144	262	286
419	422	Upstream	C	2009-06-05	1230	1349	10909.1		NSC 91789
420	423	Upstream	C	2009-06-05	1104	1212	9545.45	Male	NSC 91791	Yes	Yes	226	226	266	266	112	124	161	165	177	181	147	151	244	244	139	143	124	152	262	286
421	424	Upstream	C	2009-06-05	899	1000	5000	Male	NSC 91792	Yes	Yes	226	226	262	274	112	112	161	165	173	173	135	151	244	256	139	139	152	152	282	282
422	425	Upstream	C	2009-06-05				Male	NSC 91780
423	426	Upstream	C	2009-06-05				Male	NSC 91322
424	427	Upstream	C	2009-06-05	1045	125	5909.09	Male	NSC 91788	Yes	Yes	222	226	262	266	112	112	161	161	157	181	135	151	256	256	139	143	152	152	254	262
425	428	Upstream	C	2009-06-05	1176	1271	9545.45	Male	NSC 75745	Yes	Yes	218	226	266	274	108	128	161	161	165	189	135	135	256	256	139	139	124	124	286	286
426	429	Upstream	C	2009-06-05				Male	NSC 91020
427	430	Upstream	C	2009-06-05					White 0612
428	431	Upstream	C	2009-06-06	1130	1235	8863.64	Male	NSC 86061
429	432	Upstream	C	2009-06-06				Male	NSC 91325
430	433	Upstream	C	2009-06-06				Male	NSC 91982
431	434	Upstream	C	2009-06-06				Female	NSC 79786
432	435	Upstream	C	2009-06-06				Male	NSC 91338
433	436	Upstream	C	2009-06-06				Male	NSC 91792
434	437	Upstream	C	2009-06-07	1183	1327	14727.3		NSC 91793
435	437.1	Upstream	C	2009-06-07	956	1080	7272.73		NSC 91794
436	438	Upstream	C	2009-06-07				Male	NSC 91953
437	438.1	Upstream	C	2009-06-07				Male	NSC 75720
438	439	Upstream	C	2009-06-07				Female	NSC 79786
439	440	Upstream	C	2009-06-07	1276	1429	16363.6	Female	NSC 91795	Yes	Yes	222	222	266	266	108	112	161	161	189	189	151	151	244	256	139	143	144	152	262	286
440	441	Upstream	C	2009-06-08		1127	559545		NSC 91796
441	442	Upstream	C	2009-06-08	935	1036	5454.55		NSC 91797
442	443	Upstream	C	2009-06-08	1124	1237	12272.7	Female	NSC 91798	Yes	Yes	222	222	266	266	112	112	165	165	181	189	135	151	256	256	139	139	144	144	262	286
443	444	Upstream	C	2009-06-08				Female	NSC 91997	Yes	Yes	222	222	266	266	108	132	161	165	157	201	135	135	244	256	139	143	124	152	262	286
444	445	Upstream	C	2009-06-08	952	1054	6136.36		NSC 91799
445	446	Upstream	C	2009-06-08	1085	1226	9318.18	Female	NSC 91800	Yes	Yes	222	226	266	274	112	132	161	165	173	177	135	151	256	260	139	139	144	152	262	286
446	447	Upstream	C	2009-06-09				Male	NSC 91776
447	448	Upstream	C	2009-06-09	1017	1098	6590.91		NSC 75738
448	449	Upstream	C	2009-06-09	959	1067	6818.18		NSC 87515
449	450	Upstream	C	2009-06-09	1215	1354	13636.4	Female	NSC 91751	Yes	Yes	222	226	266	266	108	112	165	165	157	189	135	151	256	260	139	143	144	152	254	262
450	451	Upstream	C	2009-06-10					NSC 91340
451	452	Upstream	C	2009-06-10	841	952	3636.36	Male	NSC 91752	Yes	Yes	222	222	274	274	112	112	165	165	165	201	135	135	244	256	139	139	144	152	262	286
452	453	Upstream	C	2009-06-10	1295	1425	18636.4	Female	NSC 91753
453	454	Upstream	C	2009-06-10	843	1014	2272.73		NSC 91754
454	M1000	Upstream	C	2009-06-10	985	1084	7500	Male	NSC 87658	Yes	Yes	226	226	262	266	128	132	161	165	165	189	135	151	256	260	139	139	124	144	254	254
455	F4	Upstream	C (broodstock)	2010				Female		Yes	Yes	218	226	262	266	112	124	161	165	157	173	135	151	248	260	139	143	144	152	254	286
456	F5	Upstream	C (broodstock)	2010				Female		Yes	Yes	226	226	266	266	128	132	165	165	165	181	135	135	244	256	139	139	124	144	258	262
457	M1	Upstream	C (broodstock)	2010				Male		Yes	Yes	222	226	266	266	112	112	165	165	165	185	135	135	256	256	139	139	144	144	254	254
458	M2	Upstream	C (broodstock)	2010				Male		Yes	Yes	218	226	266	266	112	112	165	165	157	173	135	151	256	260	139	143	144	144	254	254
459	M3	Upstream	C (broodstock)	2010				Male		Yes	Yes	218	218	262	266	112	112	161	165	181	189	147	151	252	256	139	139	144	152	262	286
460	M4	Upstream	C (broodstock)	2010				Male		Yes	No (no amplification at ≥ 3 loci)
461	M5	Upstream	C (broodstock)	2010				Male		Yes	Yes	222	226	266	274	112	132	161	165	181	181	135	151	248	256	139	143	144	152	262	286
462	M537	Upstream	C (broodstock)	2010				Male		Yes	Yes	222	226	266	274	112	128	161	161	181	181	135	135	256	256	139	139	128	152	254	262
463	M8	Upstream	C (broodstock)	2010				Male		Yes	Yes	218	222	262	274	112	128	161	165	157	181	135	135	256	260	139	139	124	124	254	262
464	M9	Upstream	C (broodstock)	2010				Male		Yes	Yes	222	226	266	274	124	132	161	165	157	181	135	151	256	256	139	139	144	152	262	282

## Sheet: Juvenile Data
Original Order	Fish #	Location	Zone	Date	Fork Length	Total Length	Weight (g)	Age	Floy Tag	Growth group	Known passage	Genotyped	Analyzed	AfuG74	AfuG74-2	AfuG56	AfuG56-2	Afu68	Afu68-2	AfuG195	AfuG195-2	Afu68b	Afu68b-2	AfuG160	AfuG160-2	AfuG112	AfuG112-2	AfuG63	AfuG63-2	AfuG9	AfuG9-2	Spl120	Spl120-2
1	1	Upstream	A	2010-05-19	596	686	1450	8		upstream		Yes		222	226	266	266	112	132	161	161	157	165	135	151	256	260	139	139	144	152
2	2	Upstream	A	2010-05-19	718	821	2550	9	Yellow 3049	upstream		Yes		226	226	266	266	112	152	165	165	157	173	151	151	256	256	143	143	152	152	262	282
3	3	Upstream	A	2010-06-02	744	851	2820	9	Yellow 2400	upstream		Yes		218	218	266	266	112	112	161	161	165	181	147	151	256	260	143	147	144	144	262	282
4	4	Upstream	A	2010-06-02	580	654	1430	8	NSC 87784	upstream		Yes		218	226	266	266	108	112	161	165	181	189	135	151	260	260	139	139	144	152	286	286
5	5	Upstream	A	2010-06-02	592	665	1950	8	Yellow 3501	upstream		Yes		218	218	266	266	112	112	161	165	177	177	135	135	256	260	139	139	144	144	286	286
6	6	Upstream	A	2010-06-02	692	779	2440	8	Yellow 3502	upstream		Yes		222	226	262	266	112	156	165	165	181	189	135	135	256	256	143	143	152	156	262	286
7	7	Upstream	A	2010-06-02	615	702	1530	9	Yellow 3503	upstream		Yes		222	222	266	274	112	112	165	165	189	201	135	135	260	264	143	143	144	152	254	262
8	8	Upstream	A	2010-06-02	684	763	2090	8	Yellow 3504	upstream		Yes		218	222	266	266	108	112	161	165	181	181	135	147	260	264	143	143	152	152	254	282
9	9	Upstream	A	2010-06-02	604	701	1800	8	Yellow 3505	upstream		Yes		222	226	266	266	108	112	161	165	189	201	135	151	256	260	139	139	124	144	262	282
10	10	Upstream	A	2010-06-02	663	743	2010	8	NSC 77385	upstream		Yes		218	226	262	274	112	112	161	165	181	181	135	135	248	256	139	139	144	152	286	286
11	11	Upstream	A	2010-06-02	575	649	1590	8	Yellow 3506	upstream		Yes		222	222	274	274	112	124	161	165	173	181	151	151	244	256	139	143	152	152	262	262
12	12	Upstream	A	2010-06-02	600	688	1560	8	Yellow 3508	upstream		Yes		218	226	262	266	108	112	161	161	181	181	135	151	260	264	143	143	124	152	262	262
13	13	Upstream	A	2010-06-02	647	739	1870	8	Yellow 3509	upstream		Yes		226	226	266	266	108	112	161	161	157	157	135	151	256	256	139	143	144	144	286	286
14	14	Upstream	A	2010-06-02	568	649	1470	8	Yellow 3510	upstream		Yes		218	226	266	266	112	112	161	165	157	181	135	147	256	256	139	143	152	152	262	286
15	15	Upstream	A	2010-06-02	580	664	1300	8	Yellow 3511	upstream		Yes		222	226	266	274	108	112			157	177	135	135	260	264	137	137	144	144
16	16	Upstream	A	2010-06-02	576	642	1340	8	Yellow 3512	upstream		Yes		222	226	262	266	112	132	161	161	165	177	135	135	252	260	143	143	144	144	262	286
17	17	Upstream	A	2010-06-02	675	760	2190	8		upstream		Yes		222	226	262	274	112	112	161	161	181	181	135	151	256	260	139	143	144	152	278	282
18	18	Upstream	A	2010-06-03	604	679	1660	8	Yellow 3513	upstream		Yes		218	226	266	266	112	112	161	161	165	177	135	135			143	143	152	152
19	19	Upstream	A	2010-06-03	710	805	2390	8	Yellow 3514	upstream		Yes		218	226	266	266	112	112	161	161	157	181	147	151			143	143	152	152
20	20	Upstream	A	2010-06-08	608	680	1490	8	Yellow 3515	upstream		Yes	No (no amplification at ≥ 3 loci)
21	21	Upstream	A	2010-06-08	684	770	2740	8	Yellow 3516	upstream		Yes		218	226	266	266	112	112	161	161	173	177	135	151	244	256	139	139	124	144	282	282
22	22	Upstream	A	2010-06-08	625	702	2000	8	Yellow 3517	upstream		Yes		222	226	266	266	104	112	165	165	181	181	135	135	256	260	139	143	144	152	282	286
23	23	Upstream	A	2010-06-08	565	642	1260	8	Yellow 3518	upstream		Yes		222	226	266	274	108	132	161	165	181	189	151	151	248	256	139	143	144	144	262	286
24	24	Upstream	A	2010-06-08	613	701	1630	8	Yellow 3519	upstream		Yes		218	226	266	266	112	124	161	161	173	181	135	151	256	256	139	139	144	144	262	262
25	25	Upstream	A	2010-06-08	645	727	1910	8	Yellow 3521	upstream		Yes	No (no amplification at ≥ 3 loci)
26	26	Upstream	A	2010-06-08	624	705	2210	8	Yellow 3522	upstream		Yes	No (no amplification at ≥ 3 loci)
27	27	Upstream	A	2010-06-08	580	672	1390	8	Yellow 3524	upstream		Yes		222	226	266	274	112	132	161	165	165	181	135	151	256	256	139	139	144	144	282	282
28	28	Upstream	A	2010-06-08	597	678	1630		Yellow 3525	upstream		Yes		226	226	266	266	112	128	161	165	157	173	135	135	256	256	139	139	152	152	262	282
29	29	Upstream	A	2010-06-09	730	801	2310		Yellow 3520	upstream		Yes	No (no amplification at ≥ 3 loci)
30	30	Upstream	A	2010-06-09	604	676	1460	7	NSC 87169	upstream		Yes		222	226	262	266	112	132	161	161	181	185	135	135	256	256	139	139	144	152	254	262
31	31	Upstream	A	2010-06-09	587	660	1460	8	Yellow 3050	upstream		Yes		218	222	262	266	112	112	161	165	157	157	135	151	256	256	143	143	144	144	286	286
32	32	Upstream	A	2010-06-09	620	679	1680	8	Yellow 3523	upstream		Yes	No (no amplification at ≥ 3 loci)
33	33	Upstream	A	2010-06-09	653	733	2170	8	Yellow 3048	upstream		Yes		222	226	266	274	112	112	161	165	165	181	135	135	244	256	139	139	152	152	262	286
34	34	Upstream	A	2010-06-09	616	715	1860	8	Yellow 3047	upstream		Yes		226	226	262	266	112	112	165	165	157	181	135	147	244	256	139	143	144	152	262	286
35	35	Upstream	B	2010-06-09	595	687	1490	8	Yellow 3042	upstream
36	36	Upstream	B	2010-06-09	645	729	1950	8	Yellow 3043	upstream		Yes		218	226	266	266	112	112	161	165	181	189	135	135	256	256	139	139	144	152	262	286
37	37	Upstream	B	2010-06-09	568	646	1330	7	Yellow 3039	upstream
38	38	Upstream	B	2010-06-09	605	675	1500	8	Yellow 3044	upstream
39	39	Upstream	B	2010-06-09	640	727	1750	9	Yellow 3040	upstream
40	40	Upstream	B	2010-06-09	610	706	1590	8	Yellow 3037	upstream		Yes		226	226	266	274	112	132	161	161			151	151	260	260	139	143	152	152	262	286
41	41	Upstream	B	2010-06-09	709	795	2440	8	Yellow 3036	upstream
42	42	Upstream	B	2010-06-09	586	669	1310	8	Yellow 3034	upstream		Yes		222	222	266	274	112	128	161	165	177	181	135	135	256	260	143	143	152	152	254	262
43	43	Upstream	B	2010-06-09	564	635	1245	7	Yellow 3033	upstream
44	44	Upstream	B	2010-06-09	580	664	1780	8	Yellow 3032	upstream
45	45	Upstream	B	2010-06-09	570	656	1330	7	Yellow 3031	upstream
46	46	Upstream	B	2010-06-09	600	676	1580	9	Yellow 3030	upstream
47	47	Upstream	B	2010-06-09	662	741	2080	8	Yellow 3029	upstream
48	48	Upstream	B	2010-06-09	645	720	1730	8	Yellow 3028	upstream		Yes		226	226	266	274	112	132	161	165	181	181	135	135	256	256	139	139	144	152	286	286
49	49	Upstream	B	2010-06-09	580	661	1580	8	Yellow 3026	upstream
50	50	Upstream	B	2010-06-09	618	712	1590	7	Yellow 3027	upstream
51	51	Upstream	B	2010-06-09	638	725	1800	9	Yellow 3045	upstream
52	52	Upstream	B	2010-06-09	590	666	1600	8	Yellow 3038	upstream
53	53	Upstream	B	2010-06-09	609	687	1620	9	Yellow 3041	upstream
54	54	Upstream	B	2010-06-09	590	676	1400	8	Yellow 3526	upstream		Yes		222	222	262	274	112	124	161	165	173	181	135	135	248	256	135	139	124	152	254	262
55	55	Upstream	B	2010-06-09	648	740	1800	8	Yellow 3527	upstream
56	56	Upstream	B	2010-06-09	619	702	1780	9	Yellow 3528	upstream		Yes		222	226	274	274	112	112	161	165	181	189	151	151	256	260	143	143	152	152	286	286
57	57	Upstream	B	2010-06-09	641	713	1910	9	Yellow 3529	upstream		Yes		222	226	266	274	112	112	165	165	177	181	135	151	256	260	139	139	144	152	254	262
58	58	Upstream	B	2010-06-09	572	656	1400	8	Yellow 3530	upstream
59	59	Upstream	B	2010-06-09	609	686	1610	8	Yellow 3531	upstream
60	60	Upstream	A	2010-06-10	630	706	1980	8	Yellow 3532	upstream		Yes		218	226	266	274	112	112	161	161	173	177	135	151	256	256	139	143	144	144	286	286
61	61	Upstream	A	2010-06-10	655	738	1840	9	Yellow 3533	upstream		Yes		218	226	266	266	112	112	161	165	157	181	135	151	244	248	139	143	152	152	258	282
62	62	Upstream	A	2010-06-10	593	670	1520	8	Yellow 3534	upstream		Yes		222	226	266	274	112	132	165	165	157	189	135	151			143	143	124	152	254	262
63	63	Upstream	A	2010-06-10	648	714	2100	9	Yellow 3535	upstream		Yes		218	226	266	274	112	124	161	161	165	181	147	151	256	256	139	143	152	152	254	286
64	64	Upstream	B	2010-06-10	582	670	1250	8	Yellow 3536	upstream
65	65	Upstream	B	2010-06-10	653	734	1790	9	Yellow 3538	upstream
66	66	Upstream	B	2010-06-10	578	666	1330	8	Yellow 3541	upstream
67	67	Upstream	B	2010-06-10	605	688	1470	8	Yellow 3543	upstream
68	68	Upstream	B	2010-06-10	591	661	1550	7	Yellow 3539	upstream
69	69	Upstream	B	2010-06-10	612	691	1490	8	Yellow 3544	upstream		Yes		222	222	266	274	112	124	161	165	165	177	135	151	260	260	143	143	152	152	258	286
70	70	Upstream	B	2010-06-10	574	649	1250	8	Yellow 3545	upstream
71	71	Upstream	B	2010-06-10	612	698	1600	9	NSC 87717	upstream
72	72	Upstream	B	2010-06-10	584	666	1280	8	NSC 88100	upstream		Yes		218	226	262	274	124	128	161	165	165	181	151	151	256	256	139	139	152	152	262	286
73	73	Upstream	B	2010-06-10	623	710	1430	9	NSC 87638	upstream		Yes		226	226	262	266	112	112	161	165	173	181	151	151	256	260	139	139	144	144	286	286
74	74	Upstream	B	2010-06-10	615	683	1560	9	Yellow 3546	upstream		Yes		218	222	266	274	112	112	161	161	181	185	135	147	256	256	139	143	144	152	262	282
75	75	Upstream	B	2010-06-10	632	712	1650		Yellow 3549	upstream		Yes		218	222	262	266	108	112	161	165	157	157	151	151	248	256	139	139			254	286
76	76	Upstream	B	2010-06-10	564	651	1340	7	Yellow 3550	upstream
77	77	Upstream	B	2010-06-10	665	746	1950	8	Yellow 3547	upstream		Yes		218	226	274	274	112	112	161	165	173	181	135	151	244	260	135	143	144	152	254	262
78	78	Upstream	B	2010-06-10	580	659	1310		Yellow 3542	upstream		Yes		226	226	266	274	112	112	161	165	165	181	135	135	260	260	139	143	144	144	258	262
79	79	Upstream	B	2010-06-10	562	650	1250	7	NSC 87020	upstream
80	80	Upstream	B	2010-06-10	558	627	1360	8	Yellow 3537	upstream		Yes		222	226	262	266	112	112	161	165	173	181	135	151	256	256	139	139	144	152	262	286
81	81	Upstream	B	2010-06-10	621	702	1280	8	Yellow 3548	upstream
82	82	Upstream	B	2010-06-10	636	724	1680	8	NSC 87705	upstream
83	83	Upstream	B	2010-06-10	581	652	1390	8	White 0554	upstream
84	84	Upstream	B	2010-06-10	618	680	1540	8	White 0559	upstream		Yes		222	222	266	266	112	124	161	165	157	181	135	151	248	256	139	143	144	152	262	286
85	85	Upstream	B	2010-06-10	645	741	1610	7	White 0553	upstream
86	86	Upstream	B	2010-06-10	634	732	1770	8	White 0556	upstream
87	87	Upstream	B	2010-06-10	610	694	1760	8	White 0551	upstream		Yes		222	222	266	274	112	132	161	165	165	165	135	135	244	248	135	139	152	152	286	286
88	88	Upstream	B	2010-06-10	559	642	1270	8	White 0558	upstream
89	89	Upstream	B	2010-06-10	608	687	1480	8	White 0552	upstream		Yes		218	226	266	274	112	112	165	165	157	157	135	135			139	139			262	286
90	90	Upstream	B	2010-06-10	625	710	1600	8	Yellow 3540	upstream
91	91	Upstream	B	2010-06-10	618	702	1500	8	White 0560	upstream		Yes		222	222	266	266	112	132	165	165	173	181	135	135	260	260	139	139	124	124	262	262
92	92	Upstream	B	2010-06-10	692	784	1950	9	White 0561	upstream
93	93	Upstream	B	2010-06-10	607	691	1610	8	White 0557	upstream		Yes		222	226	266	274	112	112	161	161	165	173	135	135	256	256	139	143	144	152	258	286
94	94	Upstream	B	2010-06-10	601	677	1540	8	White 0563	upstream
95	95	Upstream	B	2010-06-10	576	651	1300	8	White 0562	upstream		Yes		222	226	266	274	112	132	161	165	165	173	151	151	260	260	139	143	152	152	282	286
96	96	Upstream	B	2010-06-10	682	767	2180	9	White 0564	upstream
97	97	Upstream	B	2010-06-10	670	756	1810	9	White 0566	upstream		Yes		222	226	266	274	112	124	161	161	165	173	135	147	256	256	139	143	124	156	262	286
98	98	Upstream	B	2010-06-10	613	690	1670	8	White 0567	upstream		Yes		222	222	266	266	112	112			173	189	135	151	256	260	139	139			262	262
99	99	Upstream	B	2010-06-10	578	656	1260	7	White 0569	upstream
100	100	Upstream	B	2010-06-10	626	697	1590	7	White 0570	upstream		Yes		222	226	274	274	108	112	161	165	173	189	135	151	256	260	139	139			262	286
101	101	Upstream	B	2010-06-10	652	748	1900	9	White 0572	upstream
102	102	Upstream	B	2010-06-10	568	645	1470	8	White 0574	upstream
103	103	Upstream	B	2010-06-10	599	686	1610	8	White 0575	upstream
104	104	Upstream	B	2010-06-10	588	648	1300	8	White 0565	upstream
105	105	Upstream	B	2010-06-10	668	741	1950	8	White 0571	upstream		Yes		218	218	266	274	124	124	161	165	157	177	135	147	256	260	139	139	152	152	286	286
106	106	Upstream	B	2010-06-10	580	662	1190	8	White 0573	upstream
107	107	Upstream	B	2010-06-10	618	707	1470	8	White 0555	upstream		Yes		222	226	262	266	112	132	161	165	165	181	135	135	256	260	139	139	144	152	262	286
108	108	Upstream	B	2010-06-10	587	655	1480	9	Grey 3476	upstream
109	109	Upstream	B	2010-06-10	668	739	2140	9	Grey 3477	upstream
110	110	Upstream	B	2010-06-10	573	646	1220	8	Grey 3478	upstream
111	111	Upstream	B	2010-06-10	670	758	2050	9	Grey 3479	upstream
112	112	Upstream	B	2010-06-10	728	821	2250	9	Grey 3480	upstream
113	113	Upstream	B	2010-06-10	624	700	1430	9	Grey 3481	upstream
114	114	Upstream	B	2010-06-10	565	641	1270	8	Grey 3482	upstream
115	115	Upstream	B	2010-06-10	603	681	1370	9	Grey 3483	upstream
116	116	Upstream	B	2010-06-10	656	735	1900	8	Grey 3484	upstream
117	117	Upstream	B	2010-06-10	605	669	1600		NSC 79434	upstream
118	118	Upstream	B	2010-06-10	606	687	1370	8	Grey 3485	upstream
119	119	Upstream	B	2010-06-10	568	637	1400	8	Grey 3486	upstream
120	120	Upstream	B	2010-06-10	581	656	1350	8	Grey 3487	upstream
121	121	Upstream	B	2010-06-10	651	736	1740	9	Grey 3488	upstream
122	122	Upstream	B	2010-06-10	557	631	1210	8	Grey 3489	upstream
123	123	Upstream	B	2010-06-10	642	719		8	Grey 3490	upstream
124	124	Upstream	B	2010-06-10	597	661	1440		Grey 3491	upstream		Yes		222	226	266	266			161	165	165	181	135	135	256	256	139	139	152	152	254	254
125	125	Upstream	B	2010-06-10	553	619	1200	8	Grey 3492	upstream		Yes		226	226	266	266	112	112	161	161	181	189	135	147	256	256	139	139	152	152	262	286
126	126	Upstream	B	2010-06-10	581	652	1210	8	Grey 3493	upstream		Yes		226	226	262	274	104	112	161	161	157	173	135	151	248	252	139	147	124	152	262	262
127	127	Upstream	B	2010-06-10	644	718	1690	9	Grey 3494	upstream		Yes		222	226	262	266	112	112	161	161	177	181	135	151	256	256	139	143	152	152	262	282
128	128	Upstream	B	2010-06-10	585	663	1270	7	Grey 3495	upstream
129	129	Upstream	B	2010-06-10	645	722	1700	8	Grey 3496	upstream		Yes		218	222	266	266	104	112	161	161	165	189	135	151	256	260	139	139	156	156	282	286
130	130	Upstream	B	2010-06-11	604	680	1480	8		upstream
131	131	Upstream	B	2010-06-11	604	685	1590	8		upstream		Yes		222	222	262	262	104	112	165	165	165	177	135	151	256	256	135	139	120	140	262	286
132	132	Upstream	B	2010-06-11	602	684	1450	8		upstream
133	133	Upstream	B	2010-06-11	656	734	1980	9		upstream
134	134	Upstream	B	2010-06-11	586	646	1400	8		upstream		Yes		226	226	266	266	112	128	161	161	157	165	135	135	248	260	139	139	124	144	254	282
135	135	Upstream	B	2010-06-11	572	652	1520	7		upstream
136	136	Upstream	B	2010-06-11	623	681	1860	8	NSC 63363	upstream
137	137	Upstream	B	2010-06-11	632	720	1740	8		upstream
138	138	Upstream	A	2010-06-15	693	781	2290	10		upstream		Yes		218	222	266	266	112	112	165	165	165	181	135	147	256	256	139	139	144	156	254	262
139	139	Upstream	B	2010-06-11	562	646	1390	7		upstream		Yes		218	218	262	266	108	112	161	165	181	181	135	135	256	260	139	139	144	144	262	286
140	140	Upstream	B	2010-06-11	641	710	1970	8		upstream
141	141	Upstream	B	2010-06-11	600	670	1580	8		upstream		Yes		218	226	262	266	112	112	161	165	181	189	135	151	244	260	139	147	144	152	258	286
142	142	Upstream	B	2010-06-11	596	670	1530	9		upstream		Yes		226	226	262	266	112	112	165	165	165	177	135	135	244	244	139	147	144	152	258	282
143	143	Upstream	B	2010-06-11	605	682	1410	8		upstream
144	144	Upstream	B	2010-06-11	700	787	2090	8		upstream
145	145	Upstream	B	2010-06-11	604	675	1770	9		upstream
146	146	Upstream	B	2010-06-11	562	651	1200	8	White 0648	upstream		Yes		222	226	266	266	112	132	161	161	181	181	135	151	256	260	139	139	144	152	286	286
147	147	Upstream	B	2010-06-11	632	713	1850	8		upstream
148	148	Upstream	B	2010-06-11	665	744	2080	8		upstream
149	149	Upstream	B	2010-06-11	577	661	1270	8		upstream
150	150	Upstream	B	2010-06-11	660	752	2070	8		upstream
151	151	Upstream	B	2010-06-11	711	802	2290	9		upstream
152	152	Upstream	B	2010-06-11	601	683	1250	9		upstream
153	153	Upstream	B	2010-06-11	570	649	1270	8		upstream		Yes		222	226	262	274	112	112	165	165	165	201	135	151	244	256	139	143
154	154	Upstream	B	2010-06-11	555	627	1120	7		upstream
155	155	Upstream	B	2010-06-11	632	722	1570	8		upstream
156	156	Upstream	A	2010-06-11	617	676	1690	9		upstream		Yes		218	218	266	274	112	112	161	161	165	181	135	135	256	256	139	139	160	160	262	286
157	157	Upstream	A	2010-06-11	577	652	1580	8		upstream		Yes		226	226	262	266	112	132	161	161	157	177	135	151	244	256	139	143	144	152	262	286
158	158	Upstream	A	2010-06-11	620	696	1740	8		upstream		Yes		218	218	266	266	108	108	161	165	173	181	135	151	244	256	139	139	152	152	286	286
159	159	Upstream	A	2010-06-11	692	770	2070	8		upstream		Yes		222	226	266	266	112	112	161	165	165	165	135	135	256	256	139	139	152	156	254	254
160	160	Upstream	A	2010-06-11	640	725	2090	8		upstream		Yes		218	226	266	266	112	112	161	165	177	189	135	151	260	260	139	143	124	152	262	286
161	161	Upstream	A	2010-06-11	604	687	1540	8		upstream		Yes		222	226	266	266	112	112	161	161	173	173	135	151	256	256	139	147	144	152	282	286
162	162	Upstream	A	2010-06-11	639	730	1760	8		upstream		Yes	No (no amplification at ≥ 3 loci)
163	163	Upstream	A	2010-06-11	589	671	1610	8		upstream		Yes		222	222	266	266	112	112	161	165	157	177	135	151	244	256	139	143	124	144	262	282
164	164	Upstream	A	2010-06-16	599	672	1680	8		upstream		Yes		218	226	266	266	112	112	161	165	157	181	135	135	256	260	139	143	124	152	282	282
165	165	Upstream	A	2010-06-16	628	707	1830	8		upstream		Yes		222	226	266	266	108	112	161	165	173	189	151	151	256	256	139	143	144	144	262	286
166	166	Upstream	A	2010-06-16	581	651	1390	8		upstream		Yes		218	218	266	266	108	112	161	161	165	189	135	151	244	260	139	143	144	152	258	262
167	167	Upstream	A	2010-06-16	559	629	1310	8		upstream		Yes		218	226	262	274	112	132	161	161	177	181	135	135	256	256	139	139	144	152	254	286
168	168	Upstream	A	2010-06-16	636	725	2000	8		upstream		Yes		226	226	266	266	124	128	161	165	157	173	135	151	256	256	139	139	144	152	254	286
169	169	Upstream	A	2010-06-16	616	699	1640	7		upstream		Yes		226	226	262	266	112	124	161	161	181	181	135	135	244	248	139	139	152	152	262	286
170	170	Upstream	A	2010-06-16	608	676	1770	8		upstream		Yes		226	226	266	266	108	112	161	161	157	189	135	135	260	260	139	147	152	152	282	286
171	171	Upstream	A	2010-06-16	700	791	2070	8		upstream		Yes		218	226	266	274	112	112	161	165	165	185	135	147	256	256	135	139	152	152	254	286
172	172	Upstream	A	2010-06-17	629	710	2020	8		upstream		Yes		226	226	266	274	112	112	161	165	165	173	135	135	256	256	139	139	144	144	262	286
173	173	Upstream	A	2010-06-17	635	717	2050	8		upstream		Yes		222	222	266	274	112	112	161	161	181	201	147	151	256	260	139	139	144	152	286	286
174	174	Upstream	A	2010-06-17	655	735	1780	8		upstream		Yes		226	226	266	266	112	112	161	161	165	189	147	151	256	256	139	139	144	152	262	286
175	175	Upstream	A	2010-06-17	641	722	1860	8		upstream		Yes		218	226	266	274	112	124	161	161	181	181	147	147	256	256	139	143	152	160	262	286
176	176	Upstream	A	2010-06-17	618	693	1700	8		upstream		Yes		218	222	262	266	112	112	161	161	157	181	135	135	244	248	139	139	144	144	262	286
177	177	Upstream	A	2010-06-17	579	653	1380	8		upstream		Yes		218	226	266	274	112	112	161	165	157	173	135	135	256	260	139	139	144	152	286	286
178	178	Upstream	A	2010-06-17	655	743	2110	9		upstream		Yes		226	226	266	274	112	132	165	165	181	181	135	135	256	260	139	139	144	144	282	286
179	179	Upstream	A	2010-06-17	568	643	1270	8		upstream		Yes		222	226	266	274	108	112	165	165	173	173	135	135	248	256	139	143	124	144	262	286
180	180	Upstream	A	2010-06-17	608	684	1530	8	White 0443	upstream		Yes		226	226	266	266	112	112	161	165	157	165	151	151	248	256	139	143	144	152	282	286
181	181	Upstream	A	2010-06-17	675	762	2080	8		upstream		Yes		222	222	266	274	112	112	165	165	165	181	135	135	256	256	139	139	144	152	262	286
182	182	Upstream	A	2010-06-17	585	650	1430	8		upstream		Yes		222	226	266	266	112	112	161	165	181	189	135	135	256	256	139	143	144	152	262	262
183	183	Upstream	A	2010-06-18	581	663	1540	8		upstream		Yes		222	226	266	274	112	112	161	165	181	189	147	151	256	260	139	143	144	152	262	286
184	184	Upstream	A	2010-06-18	588	674	1680	8		upstream		Yes		226	226	262	274	112	112	161	165	189	201	151	151	256	260	139	143	144	144	286	286
185	185	Upstream	A	2010-06-18	571	653	1370	8		upstream		Yes		222	226	266	266	108	112	161	165	157	181	151	151	256	260	139	143	124	144	262	286
186	186	Upstream	A	2010-06-18	651	742	2260	9		upstream		Yes		222	226	266	266	112	112	161	165	157	165	135	151	248	256	135	139	144	152	262	262
187	187	Upstream	A	2010-06-18	684	772	2020	8		upstream		Yes		222	226	262	266	108	112	161	165	157	189	135	151	256	256	139	143	124	144	262	262
188	188	Upstream	A	2010-06-18	642	731	1750	9		upstream		Yes		222	226	266	274	112	124	161	161	157	181	135	135	256	260	143	147	144	152	254	286
189	189	Upstream	A	2010-06-18	720	796	2270	8		upstream		Yes		218	222	266	274	112	112	161	161	181	189	151	151	244	256	139	139	144	152	262	282
190	190	Upstream	A	2010-06-18	643	715	1780	8		upstream		Yes		222	226	266	266	112	112	161	165	173	177	135	135	260	260	139	147	144	152	254	286
191	191	Upstream	A	2010-06-18	701	770	2190	10		upstream		Yes		222	226	274	274	112	112	161	161	165	181	135	151	256	256	139	139	152	160	286	286
192	192	Upstream	A	2010-06-18	600	681	1660	9		upstream		Yes		226	226	266	266	112	112	161	165	173	181	135	151	244	260	135	139	152	152	262	286
193	193	Upstream	A	2010-06-18	566	655	1400	8		upstream		Yes		226	226	262	266	112	112	161	161	173	181	135	151	256	256	139	139	144	152	262	282
194	194	Upstream	A	2010-06-18	721	815	2720	8		upstream		Yes		226	226	266	266	112	128	161	165	189	189	135	151	244	256	139	139	144	152	262	262
195	195	Upstream	A	2010-06-18	597	672	1710	8	NSC 84875	upstream		Yes		218	226	266	266	112	112	161	165	181	181	151	151	256	256	139	139	152	152	262	262
196	196	Upstream	A	2010-06-18	611	692	1990	8		upstream		Yes		218	226	266	274	108	112	161	161	157	165	151	151	256	256	139	139	124	152	262	282
197	197	Upstream	B	2010-07-21	615	702	1700	8		upstream
198	198	Upstream	B	2010-07-21	558	624	1240	8		upstream		Yes		222	222	262	262	108	112	161	161	165	181	151	151	244	256	139	143	124	144	286	286
199	199	Upstream	B	2010-07-21	590	672	1400	9		upstream		Yes	No (no amplification at ≥ 3 loci)
200	200	Upstream	B	2010-07-21	572	677	1360	8		upstream		Yes		222	226	266	266	112	112	161	165	177	181	135	151	256	256	135	147	152	152	282	286
201	201	Upstream	B	2010-07-21	610	692	1560	8		upstream		Yes		218	226	266	266	128	132	161	161	177	189	135	147	256	260	139	139	144	152	262	262
202	202	Upstream	B	2010-07-21	558	632	1370	8		upstream
203	203	Upstream	B	2010-07-21	609	697	1650	8		upstream
204	204	Upstream	B	2010-07-21	647	736	1980	8		upstream		Yes		222	226	266	266			161	161			135	151	244	256	135	143	144	152	258	286
205	205	Upstream	B	2010-07-21	558	629	1220	8		upstream
206	206	Upstream	B	2010-07-21	574	665	1550	8		upstream
207	207	Upstream	B	2010-07-21	585	658	1340	8		upstream		Yes		218	226	266	274	108	108	161	165	173	181	135	135	260	260	139	139	124	144	254	286
208	208	Upstream	B	2010-07-21	615	702	1460	8		upstream
209	209	Upstream	B	2010-07-21	575	659	1480	7		upstream		Yes		222	226	266	274	112	112	161	161	165	181	135	135	256	256	139	139	144	152	282	282
210	210	Upstream	B	2010-07-21	591	673	1680	8		upstream		Yes		226	226	266	266	112	112	161	161	165	189	135	151	256	260	139	139	124	144	286	286
211	211	Upstream	B	2010-07-21	611	691	1620	9		upstream		Yes		222	226	262	274	108	112	161	161	157	165	135	135	256	256	139	139	144	144	262	262
212	212	Upstream	B	2010-07-21	620	694	1900	9		upstream		Yes		218	218	266	266	112	112	161	161	157	181	147	151	256	260	139	139	124	152	286	286
213	213	Upstream	B	2010-07-21	610	686	1670	8		upstream
214	214	Upstream	B	2010-07-21	578	651	1340	8		upstream
215	215	Upstream	B	2010-07-21	598	680	1490	7		upstream
216	216	Upstream	B	2010-07-21	568	633	1450	8		upstream		Yes		222	222	266	266	112	112	161	165	173	181	135	151	244	256	139	139	144	144	286	286
217	217	Upstream	B	2010-07-21	624	701	1800	8		upstream		Yes		222	222	262	266	112	112	161	161	181	181	147	151	260	260	139	139	144	144	254	282
218	218	Upstream	B	2010-07-21	614	702	1510	8		upstream
219	219	Upstream	B	2010-07-21	551	643	1430	8		upstream
220	220	Upstream	B	2010-07-21	551	632	1170	8	NSC 87563	upstream
221	221	Upstream	B	2010-07-21	586	660	1470	8		upstream
222	222	Upstream	B	2010-07-21	595	682	1460	8		upstream
223	223	Upstream	B	2010-07-21	604	667	1550	8		upstream
224	224	Upstream	B	2010-07-21	600	685	1600	8		upstream
225	225	Upstream	B	2010-07-21	584	670	1360	8		upstream		Yes		222	226	262	266	112	112	161	165	181	181	135	135	256	256	139	139	124	152	262	286
226	227	Downstream	DS	2010-08-04	715	820	2270	≥12		downstream slow
227	228	Downstream	DS	2010-08-04	678	773	1920	≥12		downstream slow
228	229	Downstream	DS	2010-08-04	650	737	1920	≥12		downstream slow
229	230	Downstream	DS	2010-08-04	665	760	2060	≥12		downstream slow
230	231	Downstream	DS	2010-08-04	676	771	2160	9	NSC 91775	downstream fast	Floy tag	Yes		218	226	266	266	112	112	161	161	165	181	135	147	256	256	139	139	144	152	262	286
231	232	Downstream	DS	2010-08-04	645	732	2000	8		downstream fast		Yes		222	226	262	266	112	112	161	165	181	189	135	135	244	256	139	139	144	160	262	262
232	233	Downstream	DS	2010-08-04	720	795	2400	≥12		downstream slow
233	234	Downstream	DS	2010-08-04	615	703	1380	≥12		downstream slow
234	235	Downstream	DS	2010-08-04	611	696	1440	≥12		downstream slow
235	236	Downstream	DS	2010-08-05	709	792	2270	≥12		downstream slow
236	237	Downstream	DS	2010-08-05	653	748	1930	≥12		downstream slow
237	238	Downstream	DS	2010-08-05	668	752	2090	≥12		downstream slow
238	239	Downstream	DS	2010-08-05	665	742	1930	≥12		downstream slow
239	240	Downstream	DS	2010-08-05	715	806	2620	≥12		downstream slow
240	241	Downstream	DS	2010-08-05	695	790	1970	≥12		downstream slow
241	242	Downstream	DS	2010-08-05	697	777	2150	≥12		downstream slow
242	243	Downstream	DS	2010-08-05	719	805	2210	≥12		downstream slow
243	244	Downstream	DS	2010-08-05	600	690	1460	≥12		downstream slow
244	245	Downstream	DS	2010-08-05	618	704	1700	≥12		downstream slow
245	246	Downstream	DS	2010-08-05	634	702	1610	≥12		downstream slow
246	247	Downstream	DS	2010-08-06	654	732	1560	≥12		downstream slow
247	248	Downstream	DS	2010-08-06	706	790	2600	≥12		downstream slow
248	249	Downstream	DS	2010-08-06	663	751	1840	≥12		downstream slow
249	250	Downstream	DS	2010-08-06	699	792	2280	≥12		downstream slow
250	251	Downstream	DS	2010-08-06	639	746	1550	≥12		downstream slow
251	252	Downstream	DS	2010-08-06	640	719	1820	≥12	White 6505	downstream slow
252	253	Downstream	DS	2010-08-06	630	712	1650	≥12		downstream slow
253	254	Downstream	DS	2010-08-06	661	740	1700	≥12		downstream slow
254	255	Downstream	DS	2010-08-06	600	674	1320	≥12		downstream slow
255	256	Downstream	DS	2010-08-06	626	711	1590	≥12		downstream slow
256	257	Downstream	DS	2010-08-06	656	736	1600	≥12		downstream slow
257	258	Downstream	DS	2010-08-06	612	688	1480	≥12		downstream slow
258	259	Downstream	DS	2010-08-06	711	819	2490	≥12		downstream slow
259	260	Downstream	DS	2010-08-06	572	644	1130	≥12	Red 0664	downstream slow
260	261	Downstream	DS	2010-08-09	666	756	1850	≥12	White 06350	downstream slow
261	262	Downstream	DS	2010-08-09	675	775	2190	≥12		downstream slow
262	263	Downstream	DS	2010-08-09	485	535	700	7		downstream slow		Yes		218	226	262	266			165	165	181	181	135	151	244	256	127	143	144	152	262	286
263	264	Downstream	DS	2010-08-09	660	734	1970	≥12		downstream slow
264	265	Downstream	DS	2010-08-09	492	557	750	9		downstream slow
265	266	Downstream	DS	2010-08-09	620	696	1280	≥12		downstream slow
266	267	Downstream	DS	2010-08-09	518	577	930	9		downstream slow		Yes		222	226	266	266	112	128	165	165	157	189	147	147	244	256	139	139	140	152	262	286
267	268	Downstream	DS	2010-08-09	570	653	1040	≥12	MBF 4,520	downstream slow
268	269	Downstream	DS	2010-08-09	452	518	620	7		downstream slow
269	270	Downstream	DS	2010-08-09	645	746	1780	≥12		downstream slow
270	271	Downstream	DS	2010-08-09	616	700	1350	11		downstream fast		Yes		226	226	266	266	112	112	161	165	157	189	135	147	244	256	139	139	152	152	282	286
271	272	Downstream	DS	2010-08-09	626	715	1470	≥12		downstream slow
272	273	Downstream	DS	2010-08-09	596	678	1520	≥12		downstream slow
273	274	Downstream	DS	2010-08-09	487	544	740	8		downstream slow		Yes		226	226	266	266	112	112			181	189	135	147	256	256	139	139	144	144	262	286
274	275	Downstream	DS	2010-08-09	632	725	1760	≥12		downstream slow
275	276	Downstream	DS	2010-08-09	644	741	1690	≥12		downstream slow
276	277	Downstream	DS	2010-08-09	614	696	1610	≥12		downstream slow
277	278	Downstream	DS	2010-08-09	454	510	630	9	White 07407	downstream slow		Yes		218	226	266	274	112	132	161	165	181	181	135	135	244	256	139	139	152	152	262	262
278	279	Downstream	DS	2010-08-10	460	519	686	8	Green 0778	downstream slow
279	280	Downstream	DS	2010-08-10	476	537	720	9		downstream slow		Yes		218	226	266	274	112	112	165	165	165	181	135	135	252	256	139	143	144	144	282	286
280	281	Downstream	DS	2010-08-10	462	525	611	8	White 07475	downstream slow
281	282	Downstream	DS	2010-08-10	480	537	725	8	White 6518	downstream slow		Yes		218	226	266	274	128	128	161	161	181	201	135	147	252	256	135	143	144	152	262	286
282	283	Downstream	DS	2010-08-10	490	545	687	10		downstream slow		Yes		222	226	274	274	112	112	165	165	189	189	135	135	256	260	139	147	124	152	254	286
283	284	Downstream	DS	2010-08-10	500	571	703	8		downstream slow		Yes		218	226	266	266	112	128	165	165	157	165	147	147	244	260	139	139	140	152	262	286
284	285	Downstream	DS	2010-08-10	491	557	857	8		downstream slow		Yes		218	226	262	274	112	112	161	165	165	181	135	151	256	260	143	143	144	152	262	286
285	286	Downstream	DS	2010-08-10	565	650	1288	7		downstream fast		Yes		222	226	266	274	112	112	161	161	181	181	135	135	256	256	139	139	152	156	262	286
286	287	Downstream	DS	2010-08-10	664	737	1786	≥12		downstream slow
287	288	Downstream	DS	2010-08-10	471	535	779	9		downstream slow
288	289	Downstream	DS	2010-08-10	468	532	633	9		downstream slow		Yes		222	226	274	274	112	124	161	165	177	201	135	151	256	256	135	135	140	140	254	286
289	290	Downstream	DS	2010-08-10	465	533	620	7		downstream slow
290	291	Downstream	DS	2010-08-10	491	558	703	8	Green 0754	downstream slow
291	292	Downstream	DS	2010-08-10	505	573	759	10		downstream slow		Yes		226	226	266	266	112	112	161	165	165	181	135	151	256	256	139	143	144	148	254	278
292	293	Downstream	DS	2010-08-10	475	537	766	9	Grey 3995	downstream slow		Yes		222	222	266	274	112	112	161	165	181	181	135	151	256	256	139	139	140	144	254	282
293	294	Downstream	DS	2010-08-10	458	525	619	7	White 06361	downstream slow
294	295	Downstream	DS	2010-08-10	470	525	714	9		downstream slow		Yes		222	226	266	274			165	165	177	181	135	147	256	260	139	139	152	152	262	286
295	296	Downstream	DS	2010-08-10	475	530	642	8		downstream slow		Yes		222	226	262	266	112	112	161	165	177	181	135	135	244	256	139	139	144	152	286	286
296	297	Downstream	DS	2010-08-10	470	521	612	9		downstream slow
297	298	Downstream	DS	2010-08-10	465	531	638	10		downstream slow		Yes		226	226	266	274	112	140	165	165	165	201	135	135	256	260	135	139			258	262
298	299	Downstream	DS	2010-08-10	504	567	929	7		downstream fast		Yes		226	226	266	274	108	128	161	165	181	181	135	135	248	256	139	143	144	152	254	282
299	300	Downstream	DS	2010-08-10	462	524	618	7		downstream slow
300	301	Downstream	DS	2010-08-10	494	556	720	9	White 06855	downstream slow
301	302	Downstream	DS	2010-08-10	520	600	917	9		downstream slow		Yes		222	226	274	274	112	128	161	165	157	181	135	147	256	256	139	139	144	152	254	254
302	303	Downstream	DS	2010-08-10	648	725	1789	≥12		downstream slow
303	304	Downstream	DS	2010-08-10	620	710	1641	≥12		downstream slow
304	305	Downstream	DS	2010-08-10	682	777	1909	≥12		downstream slow
305	306	Downstream	DS	2010-08-10	485	560	671	8		downstream slow		Yes		218	226	266	266	124	124	161	161	189	189	135	147	256	260	139	143	124	144	254	262
306	307	Downstream	DS	2010-08-10	627	720	1605	≥12		downstream slow
307	308	Downstream	DS	2010-08-10	644	722	1728	≥12		downstream slow
308	309	Downstream	DS	2010-08-10	655	741	1598	≥12		downstream slow
309	310	Downstream	DS	2010-08-10	451	512	583	8		downstream slow
310	311	Downstream	DS	2010-08-10	458	513	542	8	White 7566	downstream slow
311	312	Downstream	DS	2010-08-10	485	542	675	9		downstream slow		Yes		222	226	274	274	128	128	161	165	157	189	135	151	256	256	139	139	144	152	282	286
312	313	Downstream	DS	2010-08-10	484	545	727	10		downstream slow
313	314	Downstream	DS	2010-08-10	584	662	1341	≥12		downstream slow
314	315	Downstream	DS	2010-08-10	640	725	1698	≥12		downstream slow
315	316	Downstream	DS	2010-08-10	484	545	656	9		downstream slow		Yes		222	226	266	266	112	128	161	165	177	181	147	151	256	260	139	139	140	144	286	286
316	317	Downstream	DS	2010-08-10	474	536	659	9		downstream slow		Yes		222	226	266	266	112	124	161	161	181	189	135	147	256	260	143	143	144	144	262	286
317	318	Downstream	DS	2010-08-10	695	775	2092	≥12		downstream slow
318	319	Downstream	DS	2010-08-10	611	685	1433	≥12		downstream slow
319	320	Downstream	DS	2010-08-11	452	516	570	8		downstream slow		Yes		222	226	266	274	112	124	161	165	165	181	135	151	244	256	139	143	124	144	262	286
320	321	Downstream	DS	2010-08-11	485	555	780	10		downstream slow
321	322	Downstream	DS	2010-08-11	457	525	630	8		downstream slow
322	323	Downstream	DS	2010-08-11	481	546	640	8		downstream slow		Yes		222	226	266	266	128	128	165	165	181	181	147	151	256	256	135	139	144	144	262	286
323	324	Downstream	DS	2010-08-11	451	513	570	8	Grey 3916	downstream slow
324	325	Downstream	DS	2010-08-11	549	612	1210	8		downstream fast		Yes		222	226	266	274	112	112	161	161	173	181	135	135	248	260	139	139	144	152	262	286
325	326	Downstream	DS	2010-08-11	498	571	810	8		downstream slow
326	327	Downstream	DS	2010-08-11	626	709	1220	≥12		downstream slow
327	328	Downstream	DS	2010-08-11	661	734	1960	≥12		downstream slow
328	329	Downstream	DS	2010-08-11	463	524	730	8	Red 0680	downstream slow
329	330	Downstream	DS	2010-08-13	556	637	1200	8	White 0404	downstream fast	Floy tag	Yes				266	266	108	112	161	165	157	189	135	151	256	256	143	147	144	144	262	286
330	331	Downstream	DS	2010-08-11	610	692	1700	≥12		downstream slow
331	332	Downstream	DS	2010-08-11	480	547	680	8		downstream slow		Yes		222	226	262	266	112	128	161	161	157	173	135	135	244	260	139	139	144	152	254	286
332	333	Downstream	DS	2010-08-11	656	745	1620	≥12		downstream slow
333	334	Downstream	DS	2010-08-11	618	699	1460	≥12		downstream slow
334	335	Downstream	DS	2010-08-11	623	700	1420	≥12		downstream slow
335	336	Downstream	DS	2010-08-11	614	714	1490	≥12		downstream slow
336	337	Downstream	DS	2010-08-11	488	562	790	9	White 07825	downstream slow		Yes		218	222	262	266	112	112	161	165	165	165	135	151	260	260	127	139	152	152	254	254
337	338	Downstream	DS	2010-08-11	694	781		≥12		downstream slow
338	339	Downstream	DS	2010-08-11	467	547	610	9		downstream slow
339	340	Downstream	DS	2010-08-11	581	660	1260	7		downstream fast		Yes		218	226	266	266	112	112	161	165	181	185	135	147	256	256	139	143	152	152	262	282
340	341	Downstream	DS	2010-08-11	467	532	650	8		downstream slow
341	342	Downstream	DS	2010-08-11	455	515	590	8		downstream slow
342	343	Downstream	DS	2010-08-11	466	533	650	9	White 07450	downstream slow
343	344	Downstream	DS	2010-08-11	450	527	700	9		downstream slow
344	345	Downstream	DS	2010-08-11	616	710	1450	≥12		downstream slow
345	346	Downstream	DS	2010-08-11	631	717	1590	≥12		downstream slow
346	347	Downstream	DS	2010-08-11	676	769	1750	≥12		downstream slow
347	348	Downstream	DS	2010-08-11	465	530	610	9		downstream slow
348	349	Downstream	DS	2010-08-11	455	522	570	7		downstream slow
349	350	Downstream	DS	2010-08-11	592	668	1330	≥12		downstream slow
350	351	Downstream	DS	2010-08-11	471	545	700	10		downstream slow		Yes		226	226	262	266	112	128	161	165	157	165	135	135	252	260	139	147	124	152	254	286
351	352	Downstream	DS	2010-08-11	452	510	560	8		downstream slow
352	353	Downstream	DS	2010-08-11	650	736		≥12		downstream slow
353	354	Downstream	DS	2010-08-11	464	531	570	9		downstream slow
354	355	Downstream	DS	2010-08-11	456	515	600	9		downstream slow
355	356	Downstream	DS	2010-08-11	487	557		7	White 07484	downstream slow		Yes		222	226	266	266	112	128	165	165	177	181	135	135	256	260	139	143	144	152	254	262
356	357	Downstream	DS	2010-08-11	602	681	1440	≥12		downstream slow
357	358	Downstream	DS	2010-08-11	454	518	570	6		downstream slow		Yes		222	222	262	274	124	128	165	165	181	189	135	135	256	260	127	139	144	144	254	262
358	359	Downstream	DS	2010-08-12	451	515	550	8		downstream slow		Yes		218	222	266	274	112	128	165	165	181	181	135	151	256	260	139	143	144	152	254	258
359	360	Downstream	DS	2010-08-12	459	531	590	9		downstream slow		Yes		222	226	262	262	128	128	165	165	157	177	135	151	248	256	139	143	144	144	262	282
360	361	Downstream	DS	2010-08-12	457	521	560	7	White 07956	downstream slow		Yes		222	222	266	266	112	124	161	165	181	181	147	151	256	256	135	139	140	144	254	286
361	362	Downstream	DS	2010-08-12	477	551	740	9	White 06636	downstream slow		Yes		222	226	266	274	112	124	161	161	181	189	135	151	248	260	139	147	144	152	262	286
362	363	Downstream	DS	2010-08-12	453	511	580	8		downstream slow		Yes		226	226	262	266	112	112	161	165	181	189	135	151	252	256	139	143	128	144	254	286
363	364	Downstream	DS	2010-08-12	450	509	580	7	White 06212	downstream slow		Yes		226	226	262	274	112	128	161	165	181	181	135	147	256	260	139	139	144	152	286	286
364	365	Downstream	DS	2010-08-12	459	523	660	9		downstream slow
365	366	Downstream	DS	2010-08-12	450	524	670	8		downstream slow
366	367	Downstream	DS	2010-08-12	490	551	750	7		downstream slow
367	368	Downstream	DS	2010-08-13	480	551	730	7		downstream slow		Yes		222	222	262	266	112	112	161	165	181	181	135	135	244	256	139	139	124	152	254	262
368	369	Downstream	DS	2010-08-12	505	575	850	8		downstream slow		Yes		222	230	266	274	112	112	165	165	165	181	151	151	256	260	135	139	124	144	262	262
369	370	Downstream	DS	2010-08-12	484	557	770	9		downstream slow		Yes		226	226	266	274	108	128	165	165	189	201	135	147	256	260	139	139	140	152	262	262
370	371	Downstream	DS	2010-08-12	520	595	830	8		downstream slow		Yes		218	226	266	274	112	112	165	165	181	181	151	151	256	260	143	147	144	152	254	262
371	372	Downstream	DS	2010-08-12	468	538	620	9		downstream slow
372	373	Downstream	DS	2010-08-12	457	530	630	8		downstream slow
373	374	Downstream	DS	2010-08-12	537	610	990	6		downstream fast		Yes		222	222	266	266	112	112	161	161	173	189	135	151	248	256	135	143	144	152	282	286
374	375	Downstream	DS	2010-08-12	465	535	580	9	White 07411	downstream slow
375	376	Downstream	DS	2010-08-12	623	716	1770	≥12		downstream slow
376	377	Downstream	DS	2010-08-12	642	733	2120	8		downstream fast		Yes		226	226	266	266	112	132	161	161	157	201	135	151	256	256	143	143	144	144	262	286
377	378	Downstream	DS	2010-08-12	455	517	630	8		downstream slow		Yes		218	222	266	274	112	112	161	165	157	165	135	135	256	260	139	143	124	152	262	286
378	379	Downstream	DS	2010-08-12	473	532	660	9		downstream slow		Yes		222	226	262	266	112	128	165	165	181	189	151	151	256	256	139	139	128	152	282	286
379	380	Downstream	DS	2010-08-12	593	683	1220	≥12		downstream slow
380	381	Downstream	DS	2010-08-12	655	735		≥12		downstream slow
381	382	Downstream	DS	2010-08-12	671	754	1960	≥12	White 07684	downstream slow
382	383	Downstream	DS	2010-08-12	625	716		≥12		downstream slow
383	384	Downstream	DS	2010-08-12	482	554	710	9		downstream slow		Yes		218	222	266	266	112	112	165	165	165	177	135	147	256	256	135	139	152	152	254	262
384	385	Downstream	DS	2010-08-12	638	716	1540	≥12		downstream slow
385	386	Downstream	DS	2010-08-12	650	730	1800	≥12		downstream slow
386	387	Downstream	DS	2010-08-12	456	524	650	8		downstream slow		Yes		222	226	266	274	112	112	161	161	165	181	135	135	256	256	139	139	144	152	254	278
387	388	Downstream	DS	2010-08-12	473	535	660	8		downstream slow		Yes		218	226	262	266	112	112	165	165	177	181	135	147			139	143	144	144	262	278
388	389	Downstream	DS	2010-08-13	501	568	780	9		downstream slow		Yes		226	226	266	274	112	112	161	165	177	181	135	135	256	260	139	143	124	152	282	286
389	390	Downstream	DS	2010-08-12	456	520	630	9		downstream slow
390	391	Downstream	DS	2010-08-12	596	675	1300	10		downstream fast		Yes		222	226	266	274	112	112	161	161	165	189	135	147	244	256	135	143	140	152	282	286
391	392	Downstream	DS	2010-08-12	477	533	720	7		downstream slow		Yes		226	226	266	266	112	112	161	161	165	181	135	151	256	256	139	143	144	152	254	278
392	393	Downstream	DS	2010-08-12	627	708	1730	≥12		downstream slow
393	394	Downstream	DS	2010-08-13	649	744	1970	9		downstream fast		Yes		226	226	266	274	112	112	165	165	157	157	135	151	256	260	143	143	152	152	262	286
394	395	Downstream	DS	2010-08-13	604	675	1570	11		downstream fast		Yes		218	226	266	274	112	112	165	165	157	181	147	151	244	260	135	139	152	152	254	286
395	396	Downstream	DS	2010-08-13	468	535	650	8		downstream slow
396	397	Downstream	DS	2010-08-13	455	527	630	8	White 07918	downstream slow		Yes		222	226	262	266	112	112	161	161	181	181	135	147	256	256	139	147	124	152	262	286
397	398	Downstream	DS	2010-08-13	572	651	1310	≥12		downstream slow
398	399	Downstream	DS	2010-08-13	699	796	1900	≥12		downstream slow
399	400	Downstream	DS	2010-08-13	650	739	1670	≥12		downstream slow
400	401	Downstream	DS	2010-08-13	712	805	2050	≥12		downstream slow
401	402	Downstream	DS	2010-08-13	637	711	1480	≥12	Yellow 3207	downstream slow
402	403	Downstream	DS	2010-08-13	482	545	770	8		downstream slow		Yes		222	226	266	266	112	140	165	165	165	181	135	151	244	256	139	143	124	152	262	286
403	404	Downstream	DS	2010-08-13	465	530	610	8		downstream slow		Yes		218	226	266	274	112	112	161	161	177	181	135	135	244	260	135	135	152	152	286	286
404	405	Downstream	DS	2010-08-13	676	765	1880	≥12		downstream slow
405	406	Downstream	DS	2010-08-13	471	536	620	8		downstream slow		Yes		222	226	266	266	112	112	165	165	189	189	135	147	256	260	143	143	144	152	262	282
406	407	Downstream	DS	2010-08-13	630	726	1650	≥12		downstream slow
407	408	Downstream	DS	2010-08-13	631	723	1510	≥12		downstream slow
408	409	Downstream	DS	2010-08-13	464	522	650	8	White 07897	downstream slow
409	410	Downstream	DS	2010-08-13	631	705	1390	≥12		downstream slow
410	411	Downstream	DS	2010-08-13	550	625	1330	≥12		downstream slow
411	412	Downstream	DS	2010-08-13	654	736	1810	≥12		downstream slow
412	413	Downstream	DS	2010-08-13	455	507	570	9		downstream slow
413	414	Downstream	DS	2010-08-13	532	606	1030	7		downstream fast		Yes		222	226	262	266	112	124	161	165	165	189	135	147	256	256	139	139	124	144	262	286
414	415	Downstream	DS	2010-08-13	602	671	1310	≥12		downstream slow
415	416	Downstream	DS	2010-08-13	452	503	640	9		downstream slow		Yes		226	226	266	274	112	112	161	165	165	181	135	135	256	256	139	139	152	156	254	262
416	417	Downstream	DS	2010-08-13	612	690	1830	≥12		downstream slow
417	418	Downstream	DS	2010-08-13	461	517	560	9		downstream slow
418	419	Downstream	DS	2010-08-17	487	553	760	9		downstream slow		Yes		222	226	266	274	112	112	165	165	181	201	135	135	244	252	135	139	124	152	262	286
419	420	Downstream	DS	2010-08-17	496	557	740	8	White 07979	downstream slow		Yes		218	222	266	274	112	128	161	165	157	165	135	151	256	256	135	147	124	140	286	286
420	421	Downstream	DS	2010-08-17	497	558	740	9		downstream slow		Yes		218	218	266	274	112	112	161	165	181	189	151	151	252	260	135	139	144	152	258	262
421	422	Downstream	DS	2010-08-17	481	553	690	7		downstream slow		Yes		222	226	266	266	112	112	165	165	177	181	135	151	244	260	139	139	144	152	262	286
422	423	Downstream	DS	2010-08-17	489	555	760	9		downstream slow		Yes		222	226	266	274	112	128	161	165	157	201	135	151	248	252	135	139	144	144	254	262
423	424	Downstream	DS	2010-08-17	467	537	660	9		downstream slow		Yes		222	226	266	266	112	112	161	165	157	173	135	147	256	260	139	143	140	144	254	254
424	425	Downstream	DS	2010-08-17	493	565	740	8		downstream slow
425	426	Downstream	DS	2010-08-17	646	714	1730	≥12		downstream slow
426	427	Downstream	DS	2010-08-17	583	671	1160	≥12		downstream slow
427	428	Downstream	DS	2010-08-17	517	580	960	6		downstream fast		Yes		222	226	266	274	112	112	165	165	165	165	135	135	256	256	139	139	152	152	262	286
428	429	Downstream	DS	2010-08-17	648	731	1750	≥12		downstream slow
429	430	Downstream	DS	2010-08-17	461	524	700	8		downstream slow
430	431	Downstream	DS	2010-08-17	660	751	1830	≥12		downstream slow
431	432	Downstream	DS	2010-08-17	474	550	570	7		downstream slow		Yes		222	226	266	266	112	140	165	165	181	189	135	135	248	252	139	139	152	152	254	282
432	433	Downstream	DS	2010-08-17	476	537	750	9		downstream slow		Yes		222	222	262	274	112	112	165	165	181	181	135	147	244	260	139	139			262	282
433	434	Downstream	DS	2010-08-17	486	552	730	8		downstream slow		Yes		226	226	266	274	112	128	161	165	181	181	135	151	256	260	139	139	124	144	262	286
434	435	Downstream	DS	2010-08-17	501	567	750	9	Yellow 0874	downstream slow		Yes		222	226	266	274	112	112	161	161	181	189	135	151	256	256	143	143	144	144	262	286
435	436	Downstream	DS	2010-08-17	645	730	1510	≥12	White 06326	downstream slow
436	437	Downstream	DS	2010-08-17	595	661	1310	≥12		downstream slow
437	438	Downstream	DS	2010-08-17	625	724	1650	7		downstream fast	Fin clip	Yes		218	226	266	274	112	112	165	165	177	201	135	135	256	256	135	139	144	152	262	286
438	439	Downstream	DS	2010-08-17	589	674	1330	8		downstream fast		Yes		222	226	266	266	112	132	165	165	173	181	135	151	256	256	139	147	144	152	282	286
439	440	Downstream	DS	2010-08-17	635	713	1610	≥12		downstream slow
440	441	Downstream	DS	2010-08-17	612	700	1530	8		downstream fast		Yes		222	226	274	274	112	112	165	165	157	181	135	135	256	256	139	143	144	144	262	282
441	442	Downstream	DS	2010-08-17	461	520	650	7		downstream slow		Yes		222	226	274	274	112	128	161	165	189	189	135	147	256	256	139	139	152	152	254	262
442	443	Downstream	DS	2010-08-17	458	515	630	7		downstream slow		Yes		222	226	262	266	108	112	161	165	157	181	135	135	244	260	143	147	144	152	254	286
443	444	Downstream	DS	2010-08-17	674	755	1760	≥12		downstream slow
444	445	Downstream	DS	2010-08-17	455	517	620	11		downstream slow
445	446	Downstream	DS	2010-08-17	641	724	1580	≥12		downstream slow
446	447	Downstream	DS	2010-08-17	478	526	830	9		downstream slow		Yes		226	226	262	266	112	112	161	165	177	189	135	135	256	256	139	143	144	152	254	278
447	448	Downstream	DS	2010-08-17	675	755	1930	≥12	MBF 4,507	downstream slow
448	449	Downstream	DS	2010-08-17	484	542	760	8		downstream slow		Yes		218	226	266	266	112	112	161	165	181	189	135	147	256	260	139	139	144	144	254	262
449	450	Downstream	DS	2010-08-17	505	571	900	9	Green 0755	downstream slow		Yes		222	226	262	262	112	112	161	165	165	165	135	135	244	256	127	139			254	286
450	451	Downstream	DS	2010-08-17	620	717	1330	≥12		downstream slow
451	452	Downstream	DS	2010-08-17	523	590	890	8		downstream slow		Yes		218	222	266	274	112	112	161	165	165	181	135	135	260	260	139	143	140	152	262	286
452	453	Downstream	DS	2010-08-17	491	562	740	9		downstream slow		Yes		222	226	262	266	112	112	161	165	177	181	147	147	244	244	127	143	124	152	262	262
453	454	Downstream	DS	2010-08-17	492	566	830	9	Grey 3504	downstream slow		Yes		218	222	266	266	112	128	161	165	165	181	135	147			139	139	140	152	258	282
454	455	Downstream	DS	2010-08-17	639	710	1580	11		downstream slow		Yes	No (no amplification at ≥ 3 loci)
455	456	Downstream	DS	2010-08-17	475	535	670	7		downstream slow		Yes		226	226	266	266	112	112	161	165	165	181	151	151	252	256	135	139	140	140	262	286
456	457	Downstream	DS	2010-08-17	480	543	680	8	Green 0750	downstream slow		Yes		218	226	262	262	112	132	165	165	165	181	135	135	256	256	135	139	124	152	254	262
457	458	Downstream	DS	2010-08-17	683	765	1740	≥12		downstream slow
458	459	Downstream	DS	2010-08-17	457	528	650	9		downstream slow		Yes		218	226	266	274	112	132	161	165	165	181	135	147	244	260	139	139	152	152	254	286
459	460	Downstream	DS	2010-08-17	647	721	1600	≥12		downstream slow
460	461	Downstream	DS	2010-08-17	648	732	1730	≥12	Orange 0741	downstream slow
461	462	Downstream	DS	2010-08-17	640	724	1720	≥12		downstream slow
462	463	Downstream	DS	2010-08-17	646	726	1820	≥12		downstream slow
463	464	Downstream	DS	2010-08-17	450	513	520	8	White 07545	downstream slow
464	465	Downstream	DS	2010-08-17	691	785	1930	≥12		downstream slow
465	466	Downstream	DS	2010-08-17	463	525	730	8		downstream slow		Yes		218	226	274	274	108	112	165	165	157	201	135	151	244	256	139	139	124	152	262	282
466	467	Downstream	DS	2010-08-17	565	636	1200	≥12		downstream slow
467	468	Downstream	DS	2010-08-17	462	521	670	10		downstream slow		Yes		226	226	266	266	112	124	161	161	181	189	135	147	256	260	143	143	144	144	254	286
468	469	Downstream	DS	2010-08-18	452	513	570	8		downstream slow		Yes		218	222	266	274	112	112	165	165	173	181	135	151	244	256	139	139	152	160	286	286
469	470	Downstream	DS	2010-08-18	457	516	650	8		downstream slow
470	471	Downstream	DS	2010-08-18	525	596	1110	9		downstream slow		Yes		222	226	266	274	112	112	161	161	181	189	135	135	256	256	143	143	144	148	254	254
471	472	Downstream	DS	2010-08-18	674	762	1910	≥12		downstream slow
472	473	Downstream	DS	2010-08-18	520	596	1080	10		downstream slow		Yes		222	222	262	266	112	112	161	165	181	181	135	135	256	260	139	143	124	152	262	262
473	474	Downstream	DS	2010-08-18	635	721	1900	≥12		downstream slow
474	475	Downstream	DS	2010-08-18	590	681		≥12		downstream slow
475	476	Downstream	DS	2010-08-18	450	515	640	8		downstream slow
476	477	Downstream	DS	2010-08-18	474	543	660	8		downstream slow		Yes		222	226	266	274	112	128	165	165	157	189	135	135	244	260	143	147	144	152	254	286
477	478	Downstream	DS	2010-08-18	462	533	660	8		downstream slow		Yes		222	226	266	266	112	128	165	165	181	185	135	147	248	256	139	139	144	144	254	262
478	479	Downstream	DS	2010-08-18	452	514	580	≥12		downstream slow
479	480	Downstream	DS	2010-08-18	465	545	640	9		downstream slow
480	481	Downstream	DS	2010-08-18	462	513	600	7		downstream slow
481	482	Downstream	DS	2010-08-18	472	544	680	8		downstream slow		Yes		222	226	266	274	112	112	161	161	157	181	135	135	260	260	139	139	140	152	282	282
482	483	Downstream	DS	2010-08-18	462	524	650	8		downstream slow		Yes		226	226	266	274	112	112	165	165	157	157	135	135	256	256	139	147	144	144	254	286
483	484	Downstream	DS	2010-08-18	488	557	710	7		downstream slow		Yes		226	226	266	266	112	124	161	161	181	189	135	147	256	260	139	143	144	144	254	286
484	485	Downstream	DS	2010-08-18	460	526	600	9		downstream slow		Yes		218	226	266	274	112	112	165	165	157	177	135	151	244	244	135	139	152	152	262	282
485	486	Downstream	DS	2010-08-18	650	735	1680	≥12		downstream slow
486	487	Downstream	DS	2010-08-18	467	543	630	7		downstream slow		Yes		222	226	262	266	112	128	161	165	157	165	135	151	248	256	139	139	160	160	262	286
487	488	Downstream	DS	2010-08-18	463	527	640	8	White 06642	downstream slow
488	489	Downstream	DS	2010-08-18	502	559	710	8		downstream slow		Yes		222	226	266	266	112	112	161	165	181	189	147	147	256	256	139	139	124	152	262	286
489	490	Downstream	DS	2010-08-19	542	645	1100	7		downstream fast		Yes		222	226	262	266	112	112	161	165	181	181	135	135	256	256	139	143	144	152	254	262
490	491	Downstream	DS	2010-08-19	630	707	1490	≥12		downstream slow
491	492	Downstream	DS	2010-08-19	675	766	1550	≥12		downstream slow
492	493	Downstream	DS	2010-08-19	625	705	1650	≥12		downstream slow
493	494	Downstream	DS	2010-08-19	597	674	1400	≥12		downstream slow
494	495	Downstream	DS	2010-08-19	470	538	650	8		downstream slow
495	496	Downstream	DS	2010-08-19	504	578	900	6		downstream fast		Yes		222	222	266	274	112	112	161	161	157	181	135	151	256	256	135	139	152	152	262	262
496	497	Downstream	DS	2010-08-19	476	541	650	8		downstream slow		Yes		218	222	266	266	112	112	161	161	177	189	151	151	244	256	135	139	144	152	262	286
497	498	Downstream	DS	2010-08-19	525	612	900	≥12	MBF 3,215	downstream slow
498	499	Downstream	DS	2010-08-19	478	545	650	8		downstream slow		Yes		222	226	266	274	108	112	161	161	165	181	147	147	248	256	135	143	144	152	282	286
499	500	Downstream	DS	2010-08-19	453	517	630	8		downstream slow		Yes		222	226	266	266	124	128	165	165	157	165	135	147	256	260	139	139	144	152	254	262
500	501	Downstream	DS	2010-08-19	475	543	740	8		downstream slow		Yes		222	226	266	266			161	161			135	147	248	260	139	139	144	144	282	286
501	502	Downstream	DS	2010-08-19	465	532	660	7		downstream slow
502	503	Downstream	DS	2010-08-19	483	549	740	8	White 07043	downstream slow		Yes		218	222	266	266	112	112	161	165	181	181	135	151	256	256	139	139	140	140	254	282
503	504	Downstream	DS	2010-08-19	530	606	970	9		downstream slow		Yes		218	226	266	266	112	128	165	165	181	189	147	151	244	244	135	135	144	152	256	262
504	505	Downstream	DS	2010-08-19	490	552	750	7		downstream slow
505	506	Downstream	DS	2010-08-19	486	555	730	8		downstream slow		Yes		218	222	266	274	112	128	161	165	181	181	135	135	256	256	139	147	144	152	254	262
506	507	Downstream	DS	2010-08-19	515	590	910	9		downstream slow		Yes				274	274	112	132	161	161	165	181	135	151	252	256	139	139	144	144	262	262
507	508	Downstream	DS	2010-08-19	502	578	860	9		downstream slow		Yes		218	226	274	274	112	112	161	165	157	177	135	147	256	256	127	139	124	140	286	286
508	509	Downstream	DS	2010-08-19	637	719	1590	≥12		downstream slow
509	510	Downstream	DS	2010-08-19	463	522	640	8		downstream slow
510	511	Downstream	DS	2010-08-19	458	527	600	8		downstream slow
511	512	Downstream	DS	2010-08-19	512	590	840	10	Green 0728	downstream slow		Yes		226	226	266	266	112	112	161	165	157	177	135	135	256	260	139	139	124	144	254	262
512	513	Downstream	DS	2010-08-19	600	674	1440	≥12		downstream slow
513	514	Downstream	DS	2010-08-19	594	661	1220	7		downstream fast		Yes		226	226	266	274	108	112	161	161	181	181	135	151	244	256	143	143	124	152	262	286
514	515	Downstream	DS	2010-08-19	470	536	680	8		downstream slow
515	516	Downstream	DS	2010-08-19	658	745	1620	≥12		downstream slow
516	517	Downstream	DS	2010-08-19	687	759	1760	≥12		downstream slow
517	518	Downstream	DS	2010-08-19	470	542	680	9		downstream slow		Yes		222	226	266	274	112	128	161	161	173	181	151	151	256	260	139	139	144	152	262	282
518	519	Downstream	DS	2010-08-19	468	526	640	7		downstream slow
519	520	Downstream	DS	2010-08-19	451	511	640	8		downstream slow
520	521	Downstream	DS	2010-08-19	464	525	600	8		downstream slow
521	522	Downstream	DS	2010-08-19	462	527	720	8		downstream slow
522	523	Downstream	DS	2010-08-19	609	681	1500	≥12		downstream slow
523	524	Downstream	DS	2010-08-19	639	718	1910	11		downstream fast		Yes		218	222	266	274	112	112	161	165	177	181	135	135	244	256	139	139	144	152	254	254
524	525	Downstream	DS	2010-08-19	588	685	1380	10		downstream fast		Yes		222	222	266	266	112	112	161	165	165	165	135	147	244	260	139	139	152	156	254	286
525	526	Downstream	DS	2010-08-19	664	751	1650	≥12	White 0226	downstream slow
526	527	Downstream	DS	2010-08-19	591	670	1370	≥12		downstream slow
527	528	Downstream	DS	2010-08-19	628	715	1430	≥12		downstream slow
528	529	Downstream	DS	2010-08-19	620	695	1730	11		downstream fast		Yes		222	222	274	274	112	128	161	165	165	189	151	151	256	260	139	143	124	140	254	286
529	530	Downstream	DS	2010-08-19	697	780	1650	≥12		downstream slow
530	531	Downstream	DS	2010-08-20	477	548	690	8		downstream slow		Yes		218	226	266	274	128	128	161	161	157	181	151	151	248	256	139	143	144	152	262	286
531	532	Downstream	DS	2010-08-20	452	512	520	7		downstream slow		Yes		226	226	266	274	112	132	161	165	157	157	135	151	244	244	139	143	144	144	254	258
532	533	Downstream	DS	2010-08-20	479	534	630	8		downstream slow		Yes		226	226	266	266	112	112	161	161	177	189	135	135	256	256	139	143	144	144	262	278
533	534	Downstream	DS	2010-08-20	597	684	1550	8		downstream fast		Yes		222	226	262	266	112	112	161	165	165	181	147	151	248	256	139	143	144	144	282	286
534	535	Downstream	DS	2010-08-20	490	560	810	9		downstream slow		Yes		218	222	266	266	112	112	161	165	181	181	147	151	244	256	143	147	144	152	256	262
535	536	Downstream	DS	2010-08-20	619	701	1450	≥12		downstream slow
